# Supplementary material for: A non-classical copper carbonyl on a tri-alkene hydrocarbon support
Source: Royal Society of Chemistry journal article supplement (doi:10.1039/b902678a), 2009-01-01
Supplement: b902678a.pdf [file b902678a.pdf]

# A Non-Classical Copper Carbonyl on a Tri-alkene

## Hydrocarbon Support

Mauro Fianchini, Nathan J. DeYonker, Thomas R. Cundari, H. V. Rasika Dias

### Supporting Information

#### Experimental:

All manipulations were carried out under an atmosphere of dry purified argon using standard Schlenk techniques. Solvents were purchased from commercial sources, distilled and degassed by the freeze-pump-thaw method twice prior to use. Glassware was dried in the oven at 150°C overnight. The deuterated solvent ( $\text{CD}_2\text{Cl}_2$ ) was dried over activated molecular sieves overnight and degassed with argon for 15 minutes prior to use. NMR spectra were recorded at 298 K on JEOL Eclipse 500 spectrometer ( $^1\text{H}$ , 500.16 MHz,  $^{13}\text{C}$ , 125.77 MHz). IR spectra were recorded at 298 K on JASCO FT/IR-410 instrument. Raman spectra were recorded at 298 K on JORIBA JOBIN YVON instrument using a 633 nm laser source. Crystals of the samples were tightly sealed under argon in a quartz cuvette by the mean of a greased Teflon cap for the Raman study. Different experimental settings (laser intensity, level of magnification, time of exposure, number of cycles) were used for each compound in order to obtain the best signal-to-noise ratio. *Trans,trans,trans*-1,5,9-cyclododecatriene (*ttt*-cdt),  $\text{AgSbF}_6$ ,  $\text{CuCl}$  and  $\text{CO}$  were purchased from commercial sources.

**[Ag(*ttt*-cdt)( $\text{SbF}_6$ )]<sub>n</sub>:** 2.161 g of  $\text{AgSbF}_6$  (98% purity, 6.16 mmol) and 1.000 g of (E,E,E)-1,5,9-cyclododecatriene (6.16 mmol) were placed in a 25 mL flask with a magnetic stir bar. Dichloromethane (20 mL) was added to this mixture at room temperature. A white solid was precipitated immediately. The mixture was stirred overnight and then the supernatant liquid was removed. The precipitate was washed with 2 x 10 mL of dichloromethane to give [Ag(*ttt*-cdt)( $\text{SbF}_6$ )]<sub>n</sub> as a white powder in quantitative yield. It is not soluble in chlorinated solvents (perhaps has a polymeric structure), but dissolves well in acetone. It is not overly sensitive to

light ether.  $^1\text{H}$  NMR ( $\text{C}_3\text{D}_6\text{O}$ , 298 K, ppm):  $\delta$  2.04, 2.05 (d, 12 H, overlapping with deuterated solvent), 5.03 (s,  $\text{CH}=\text{CH}$ ).  $^{13}\text{C}$   $\{^1\text{H}\}$  NMR ( $\text{C}_3\text{D}_6\text{O}$ , 298 K, ppm):  $\delta$  33.0 (s,  $\text{CH}_2$ ), 36.5 (s,  $\text{CH}_2$ ), 131.2 (s,  $\text{CH}=\text{CH}$ ). Elemental analysis: calc., C, 28.49 %, H, 3.59 %; found, C, 27.89 %, H, 3.71 %. M.P.: dec > 160 °C.

**[Cu(*ttt*-cdt)(FSbF<sub>5</sub>)]:** 0.500 g of  $[\text{Ag}(\textit{ttt}\text{-cdt})(\text{SbF}_6)]_n$  (0.99 mmol) and 0.163 g of CuCl (90%, 1.48 mmol) were placed in a 50 mL flask with a magnetic stir bar. Dichloromethane (40 mL) was added to the mixture at room temperature. The mixture was stirred for about 24 hours and filtered over a bed of Celite. The filtrate was collected and the solvent was removed under vacuum to give  $[\text{Cu}(\textit{ttt}\text{-cdt})(\text{FSbF}_5)]$  in essentially quantitative yield. X-ray quality colorless crystals can be obtained from a  $\text{CH}_2\text{Cl}_2$ /hexafluorobenzene (1:1) solution at -20°C. This compound does not show any decomposition when exposed to air at room temperature. It can be stored in a vial without any precautions. However, solutions of  $[\text{Cu}(\textit{ttt}\text{-cdt})(\text{FSbF}_5)]$  in chlorinated solvents, wet acetone and THF tend to decompose over time giving a deep green-bluish solution.  $^1\text{H}$  NMR ( $\text{CD}_2\text{Cl}_2$ , 298 K, ppm):  $\delta$  2.42 (m, 6H), 2.60 (d, 6H), 5.87 (s,  $\text{CH}=\text{CH}$ ).  $^{13}\text{C}$   $\{^1\text{H}\}$  NMR ( $\text{CD}_2\text{Cl}_2$ , 298 K, ppm):  $\delta$  36.4 (s,  $\text{CH}_2$ ), 131.1 (s,  $\text{CH}=\text{}$ ). Raman (solid, 298K, notable bands,  $\text{cm}^{-1}$ ): 1581 (s,  $\text{C}=\text{C}$ ). IR (Nujol, 298K,  $\text{cm}^{-1}$ ): 1582 (vw,  $\text{C}=\text{C}$ ). Elemental analysis: calc., C, 31.23 %, H, 3.93 %; found, C, 31.27 %, H, 3.84 %. Mp.: dec > 220 °C.

**[Cu(*ttt*-cdt)(CO)][SbF<sub>6</sub>]:** 0.500 g of  $[\text{Cu}(\textit{ttt}\text{-cdt})(\text{FSbF}_5)]$  (1.08 mol) were dissolved in 5 mL of dichloromethane at room temperature. Carbon monoxide was gently bubbled into the solution for about 15 mins. The solution was concentrated under reduced pressure to a point where about 1 mL of solvent was left in the flask. Then the remaining solvent was evaporated under a carbon monoxide stream to give the carbonyl compound  $[\text{Cu}(\textit{ttt}\text{-cdt})(\text{CO})][\text{SbF}_6]$  in >90% yield.  $^1\text{H}$  NMR ( $\text{CD}_2\text{Cl}_2$ , 298 K, ppm):  $\delta$  2.38 (m, 6H), 2.57 (d, 6H), 5.86 (s,  $\text{CH}=\text{CH}$ ).  $^{13}\text{C}$   $\{^1\text{H}\}$  NMR ( $\text{CD}_2\text{Cl}_2$ , 298 K, ppm):  $\delta$  36.2 (s,  $\text{CH}_2$ ), 130.4,  $\text{CH}=\text{}$ ). Raman (solid, 298K, notable bands,  $\text{cm}^{-1}$ ): 2160 (s,  $\text{C}\equiv\text{O}$ ), 1601 (s,  $\text{C}=\text{C}$ ). IR (Nujol, 298K,  $\text{cm}^{-1}$ ): 2160 (s, CO), 1602 (vw,  $\text{C}=\text{C}$ ). Mp: dec > 220 °C, Solid material under Ar shows no appreciable change such as the loss of the coordinated CO. Solid samples of this adduct can be handled in air for a short period or placed under reduced pressure for about an hour without noticeable decomposition. Solid samples can also be stored in a sealed container for 30 days under an inter atmosphere without decomposition, but  $\text{CH}_2\text{Cl}_2$  solutions of  $[\text{Cu}(\textit{ttt}\text{-cdt})(\text{CO})][\text{SbF}_6]$  lose CO upon concentration under vacuum.

**Table S1.** Summary of key NMR and Raman spectroscopic data

| Compound                                           | $^1\text{H}$ NMR<br>( $\text{CD}_2\text{Cl}_2$ , <b>CH</b> , <b>CH</b> <sub>2</sub> ) | $^{13}\text{C}\{^1\text{H}\}$ NMR<br>( $\text{CD}_2\text{Cl}_2$ , <b>CH</b> , <b>CH</b> <sub>2</sub> ) | $\bar{\nu}(\text{C}=\text{C})$<br>( $\text{cm}^{-1}$ ) | $\bar{\nu}(\text{CO})$<br>( $\text{cm}^{-1}$ ) |
|----------------------------------------------------|---------------------------------------------------------------------------------------|--------------------------------------------------------------------------------------------------------|--------------------------------------------------------|------------------------------------------------|
| (E,E,E)-1,5,9-cyclododecatriene ( <b>ttt-cdt</b> ) | 5.00, 2.03                                                                            | 132.0, 32.9                                                                                            | 1671<br>(Raman)                                        | -                                              |
| <b>[Cu(ttt-cdt)(FSbF<sub>5</sub>)]</b>             | 5.87, 2.60 and 2.42                                                                   | 131.1, 36.4                                                                                            | 1581<br>(Raman)                                        | -                                              |
| <b>[Cu(ttt-cdt)(CO)][SbF<sub>6</sub>]</b>          | 5.86, 2.57 and 2.38                                                                   | 130.4, 36.2                                                                                            | 1601<br>(Raman)                                        | 2160<br>(Raman)                                |

**X-ray crystallographic data:**

A suitable crystal covered with a layer of cold hydrocarbon oil was selected and mounted with paratone-N oil in a cryo-loop and immediately placed in the low-temperature nitrogen stream. The X-ray intensity data were measured at 100(2) K on a Bruker SMART APEX CCD area detector system equipped with a Oxford Cryosystems 700 Series cooler, a graphite monochromator, and a Mo  $K\alpha$  fine-focus sealed tube ( $\lambda = 0.71073 \text{ \AA}$ ). The data frames were integrated with the Bruker SAINT-Plus software package. Data were corrected for absorption effects using the multi-scan technique (SADABS). Structures were solved and refined using Bruker SHELXTL (Version 6.14) software package.

$[\text{Cu}(\text{ttt-cdt})(\text{FSbF}_5)]$  crystallizes in the Monoclinic  $P2_1/m$  space group (No. 11). The Cu, Sb, F2 and F3 of  $[\text{Cu}(\text{ttt-cdt})(\text{FSbF}_5)]$  sits on a mirror plane. The *trans,trans,trans*-1,5,9-cyclododecatriene (*ttt-cdt*) ligand in the  $[\text{Cu}(\text{C}_{12}\text{H}_{18})]^+$  cation has  $D_3$  structure (propeller shape) but disordered over two positions (the two *ttt-cdt* components are present in equal amounts and are related by a mirror plane and are enantiomers). The angles involving copper and the centroids of the three olefins in  $[\text{Cu}(\text{ttt-cdt})]^+$  are  $118.8^\circ$ ,  $118.2^\circ$  and  $117.7^\circ$  (sum of Cu-alkene angles =  $354.7^\circ$  and Cu-olefin<sub>cent</sub> distances = 2.010, 2.023, 2.024 Å) while the displacement of copper from the three olefin-centroid plane is 0.2723 Å.

$[\text{Cu}(\text{ttt-cdt})(\text{CO})][\text{SbF}_6]$  crystallizes in the Cubic  $P2_13$  space group. (No. 198) Cu, Sb and the CO moiety sits on a three fold rotation axis. The *trans,trans,trans*-1,5,9-cyclododecatriene (*ttt-cdt*) ligand in the  $[\text{Cu}(\text{ttt-cdt})]^+$  cation has  $D_3$  structure but disordered over two position. The two *ttt-cdt* components are present in equal amounts. The angles involving copper and the three olefin centroids of *ttt-cdt* component one (Cu-olefin<sub>cent</sub> distance 2.146 Å) and two (Cu-olefin<sub>cent</sub> distance 2.162 Å) in  $[\text{Cu}(\text{C}_{12}\text{H}_{18})\text{CO}]^+$  are  $106.9^\circ$ ,  $106.9^\circ$  and  $106.9^\circ$  (sum of Cu-alkene angles =  $320.7^\circ$ ) and  $105.0^\circ$ ,  $105.0^\circ$ , and  $105.0^\circ$  (sum of Cu-alkene angles =

315.0°), respectively while the displacement of copper from the three olefin-centroid planes are 0.8022 Å and 0.8676 Å, respectively (for the disordered components one and two).

Overall, the disorder in  $[\text{Cu}(t,t,t\text{-cdt})(\text{FSbF}_5)]$  and  $[\text{Cu}(t,t,t\text{-cdt})(\text{CO})][\text{SbF}_6]$  were resolved satisfactorily. All the non hydrogen atoms were refined anisotropically. Hydrogen atoms were placed at calculated positions and refined riding on the corresponding carbons. The CCDC 712593 and 712594 contain the supplementary crystallographic data. These data can be obtained free of charge via <http://www.ccdc.cam.ac.uk/conts/retrieving.html> (or from the Cambridge Crystallographic Data Centre (CCDC), 12 Union Road, Cambridge, CB2 1EZ, UK).

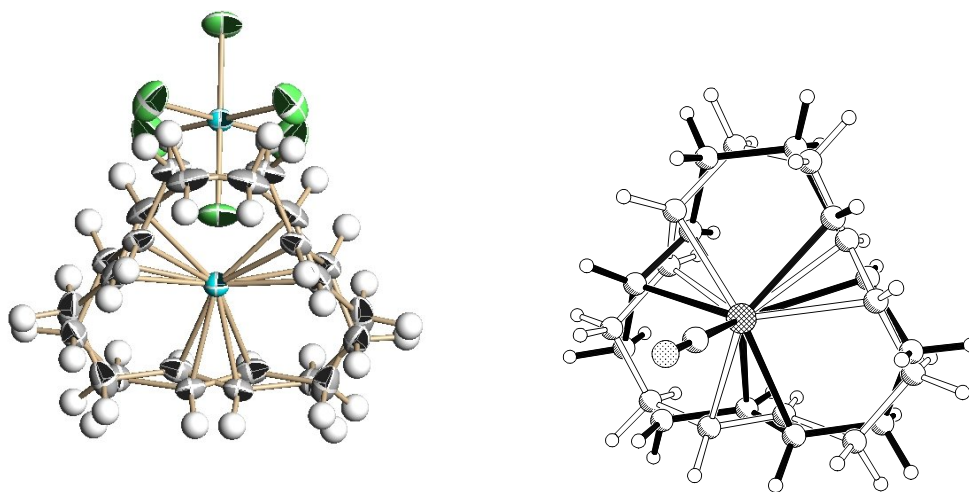

**Figure S1.** A view showing the *trans,trans,trans*-1,5,9-cyclododecatriene (*t,t,t*-cdt) ligand disorder in  $[\text{Cu}(t,t,t\text{-cdt})(\text{FSbF}_5)]$  (left) and  $[\text{Cu}(t,t,t\text{-cdt})(\text{CO})]^+$  (right)

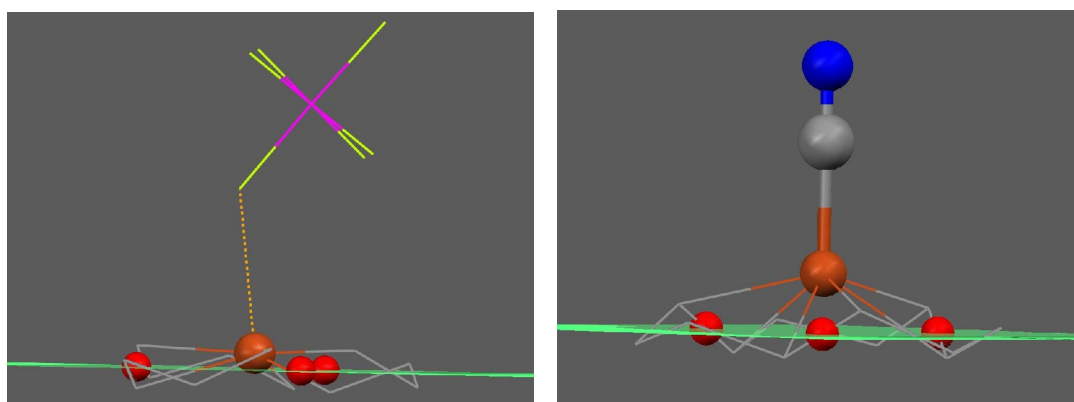

**Figure S2.** A view showing the displacement of copper atoms out of the three olefin plane in  $[\text{Cu}(t,t,t\text{-cdt})(\text{FSbF}_5)]$  (left) and  $[\text{Cu}(t,t,t\text{-cdt})(\text{CO})]^+$  (right); red spheres indicate alkene centroid positions.

Table S2. Crystal data and structure refinement for [Cu(*ttt*-cdt)(FSbF<sub>5</sub>)].

|                                   |                                                      |                  |
|-----------------------------------|------------------------------------------------------|------------------|
| Identification code               | dias586s                                             |                  |
| Empirical formula                 | C <sub>12</sub> H <sub>18</sub> Cu F <sub>6</sub> Sb |                  |
| Formula weight                    | 461.55                                               |                  |
| Temperature                       | 100(2) K                                             |                  |
| Wavelength                        | 0.71073 Å                                            |                  |
| Crystal system                    | Monoclinic                                           |                  |
| Space group                       | P2(1)/m                                              |                  |
| Unit cell dimensions              | a = 7.6618(4) Å                                      | α = 90°.         |
|                                   | b = 11.4769(6) Å                                     | β = 113.717(1)°. |
|                                   | c = 9.0706(5) Å                                      | γ = 90°.         |
| Volume                            | 730.25(7) Å <sup>3</sup>                             |                  |
| Z                                 | 2                                                    |                  |
| Density (calculated)              | 2.099 Mg/m <sup>3</sup>                              |                  |
| Absorption coefficient            | 3.357 mm <sup>-1</sup>                               |                  |
| F(000)                            | 448                                                  |                  |
| Crystal size                      | 0.20 x 0.15 x 0.13 mm <sup>3</sup>                   |                  |
| Theta range for data collection   | 2.45 to 28.31°.                                      |                  |
| Index ranges                      | -10 ≤ h ≤ 10, -15 ≤ k ≤ 15, -12 ≤ l ≤ 12             |                  |
| Reflections collected             | 7159                                                 |                  |
| Independent reflections           | 1903 [R(int) = 0.0195]                               |                  |
| Completeness to theta = 28.31°    | 99.6 %                                               |                  |
| Absorption correction             | Semi-empirical from equivalents                      |                  |
| Max. and min. transmission        | 0.6694 and 0.5532                                    |                  |
| Refinement method                 | Full-matrix least-squares on F <sup>2</sup>          |                  |
| Data / restraints / parameters    | 1903 / 0 / 152                                       |                  |
| Goodness-of-fit on F <sup>2</sup> | 1.034                                                |                  |
| Final R indices [I > 2σ(I)]       | R1 = 0.0194, wR2 = 0.0527                            |                  |
| R indices (all data)              | R1 = 0.0198, wR2 = 0.0532                            |                  |
| Largest diff. peak and hole       | 0.590 and -0.608 e.Å <sup>-3</sup>                   |                  |

Table S3. Bond lengths [Å] and angles [°] for [Cu(*ttt*-cdt)(FSbF<sub>5</sub>)].

|            |            |              |           |
|------------|------------|--------------|-----------|
| Cu-C(1)#1  | 2.110(4)   | C(2)-H(2A)   | 1.0000    |
| Cu-C(1)    | 2.110(4)   | C(3)-C(4)    | 1.542(10) |
| Cu-C(5)    | 2.117(3)   | C(3)-H(3A)   | 0.9900    |
| Cu-C(5)#1  | 2.117(3)   | C(3)-H(3B)   | 0.9900    |
| Cu-C(9)    | 2.128(4)   | C(4)-C(5)    | 1.501(8)  |
| Cu-C(9)#1  | 2.128(4)   | C(4)-H(4A)   | 0.9900    |
| Cu-C(2)    | 2.133(4)   | C(4)-H(4B)   | 0.9900    |
| Cu-C(2)#1  | 2.133(4)   | C(5)-C(6)    | 1.354(5)  |
| Cu-C(10)#1 | 2.141(4)   | C(5)-H(5A)   | 1.0000    |
| Cu-C(10)   | 2.141(4)   | C(6)-C(7)    | 1.524(8)  |
| Cu-C(6)    | 2.149(4)   | C(6)-H(6A)   | 1.0000    |
| Cu-C(6)#1  | 2.149(4)   | C(7)-C(8)    | 1.507(12) |
| Sb-F(4)#1  | 1.8633(14) | C(7)-H(7A)   | 0.9900    |
| Sb-F(4)    | 1.8633(14) | C(7)-H(7B)   | 0.9900    |
| Sb-F(3)    | 1.8640(17) | C(8)-C(9)    | 1.504(12) |
| Sb-F(1)    | 1.8640(13) | C(8)-H(8A)   | 0.9900    |
| Sb-F(1)#1  | 1.8640(13) | C(8)-H(8B)   | 0.9900    |
| Sb-F(2)    | 1.8789(18) | C(9)-C(10)   | 1.353(7)  |
| C(1)-C(2)  | 1.355(6)   | C(9)-H(9A)   | 1.0000    |
| C(1)-C(12) | 1.519(9)   | C(10)-C(11)  | 1.512(9)  |
| C(1)-H(1A) | 1.0000     | C(10)-H(10A) | 1.0000    |
| C(2)-C(3)  | 1.522(8)   | C(11)-C(12)  | 1.532(7)  |

|                   |            |                   |            |
|-------------------|------------|-------------------|------------|
| C(11)-H(11A)      | 0.9900     | C(12)-H(12A)      | 0.9900     |
| C(11)-H(11B)      | 0.9900     | C(12)-H(12B)      | 0.9900     |
| C(1)#1-Cu-C(1)    | 90.0(3)    | C(10)#1-Cu-C(6)   | 157.84(19) |
| C(1)#1-Cu-C(5)    | 132.0(2)   | C(10)-Cu-C(6)     | 119.75(19) |
| C(1)-Cu-C(5)      | 111.54(19) | C(1)#1-Cu-C(6)#1  | 148.5(2)   |
| C(1)#1-Cu-C(5)#1  | 111.54(19) | C(1)-Cu-C(6)#1    | 112.93(19) |
| C(1)-Cu-C(5)#1    | 132.0(2)   | C(5)-Cu-C(6)#1    | 20.21(13)  |
| C(5)-Cu-C(5)#1    | 24.7(2)    | C(5)#1-Cu-C(6)#1  | 37.00(14)  |
| C(1)#1-Cu-C(9)    | 24.61(17)  | C(9)-Cu-C(6)#1    | 124.6(2)   |
| C(1)-Cu-C(9)      | 112.3(2)   | C(9)#1-Cu-C(6)#1  | 88.3(2)    |
| C(5)-Cu-C(9)      | 110.99(18) | C(2)-Cu-C(6)#1    | 81.47(16)  |
| C(5)#1-Cu-C(9)    | 88.22(18)  | C(2)#1-Cu-C(6)#1  | 119.58(16) |
| C(1)#1-Cu-C(9)#1  | 112.3(2)   | C(10)#1-Cu-C(6)#1 | 119.75(19) |
| C(1)-Cu-C(9)#1    | 24.61(17)  | C(10)-Cu-C(6)#1   | 157.84(19) |
| C(5)-Cu-C(9)#1    | 88.22(18)  | C(6)-Cu-C(6)#1    | 38.2(2)    |
| C(5)#1-Cu-C(9)#1  | 110.99(18) | F(4)#1-Sb-F(4)    | 89.89(12)  |
| C(9)-Cu-C(9)#1    | 131.4(3)   | F(4)#1-Sb-F(3)    | 89.58(8)   |
| C(1)#1-Cu-C(2)    | 126.26(19) | F(4)-Sb-F(3)      | 89.58(8)   |
| C(1)-Cu-C(2)      | 37.25(16)  | F(4)#1-Sb-F(1)    | 179.68(6)  |
| C(5)-Cu-C(2)      | 88.92(14)  | F(4)-Sb-F(1)      | 89.82(9)   |
| C(5)#1-Cu-C(2)    | 113.59(14) | F(3)-Sb-F(1)      | 90.26(7)   |
| C(9)-Cu-C(2)      | 149.6(2)   | F(4)#1-Sb-F(1)#1  | 89.82(9)   |
| C(9)#1-Cu-C(2)    | 22.26(15)  | F(4)-Sb-F(1)#1    | 179.68(7)  |
| C(1)#1-Cu-C(2)#1  | 37.25(16)  | F(3)-Sb-F(1)#1    | 90.26(7)   |
| C(1)-Cu-C(2)#1    | 126.26(19) | F(1)-Sb-F(1)#1    | 90.46(11)  |
| C(5)-Cu-C(2)#1    | 113.59(14) | F(4)#1-Sb-F(2)    | 91.69(8)   |
| C(5)#1-Cu-C(2)#1  | 88.92(14)  | F(4)-Sb-F(2)      | 91.69(8)   |
| C(9)-Cu-C(2)#1    | 22.26(15)  | F(3)-Sb-F(2)      | 178.20(9)  |
| C(9)#1-Cu-C(2)#1  | 149.6(2)   | F(1)-Sb-F(2)      | 88.47(7)   |
| C(2)-Cu-C(2)#1    | 157.5(2)   | F(1)#1-Sb-F(2)    | 88.47(7)   |
| C(1)#1-Cu-C(10)#1 | 89.0(2)    | C(2)-C(1)-C(12)   | 127.7(5)   |
| C(1)-Cu-C(10)#1   | 18.71(13)  | C(2)-C(1)-Cu      | 72.3(2)    |
| C(5)-Cu-C(10)#1   | 124.54(18) | C(12)-C(1)-Cu     | 100.3(4)   |
| C(5)#1-Cu-C(10)#1 | 147.94(19) | C(2)-C(1)-H(1A)   | 114.9      |
| C(9)-Cu-C(10)#1   | 113.5(2)   | C(12)-C(1)-H(1A)  | 114.9      |
| C(9)#1-Cu-C(10)#1 | 36.96(18)  | Cu-C(1)-H(1A)     | 114.9      |
| C(2)-Cu-C(10)#1   | 38.29(17)  | C(1)-C(2)-C(3)    | 122.9(5)   |
| C(2)#1-Cu-C(10)#1 | 120.22(18) | C(1)-C(2)-Cu      | 70.4(2)    |
| C(1)#1-Cu-C(10)   | 18.71(13)  | C(3)-C(2)-Cu      | 101.5(4)   |
| C(1)-Cu-C(10)     | 89.0(2)    | C(1)-C(2)-H(2A)   | 116.8      |
| C(5)-Cu-C(10)     | 147.94(19) | C(3)-C(2)-H(2A)   | 116.8      |
| C(5)#1-Cu-C(10)   | 124.54(18) | Cu-C(2)-H(2A)     | 116.8      |
| C(9)-Cu-C(10)     | 36.96(18)  | C(2)-C(3)-C(4)    | 111.3(6)   |
| C(9)#1-Cu-C(10)   | 113.5(2)   | C(2)-C(3)-H(3A)   | 109.4      |
| C(2)-Cu-C(10)     | 120.22(18) | C(4)-C(3)-H(3A)   | 109.4      |
| C(2)#1-Cu-C(10)   | 38.29(17)  | C(2)-C(3)-H(3B)   | 109.4      |
| C(10)#1-Cu-C(10)  | 82.1(3)    | C(4)-C(3)-H(3B)   | 109.4      |
| C(1)#1-Cu-C(6)    | 112.93(19) | H(3A)-C(3)-H(3B)  | 108.0      |
| C(1)-Cu-C(6)      | 148.5(2)   | C(5)-C(4)-C(3)    | 109.8(5)   |
| C(5)-Cu-C(6)      | 37.00(14)  | C(5)-C(4)-H(4A)   | 109.7      |
| C(5)#1-Cu-C(6)    | 20.21(13)  | C(3)-C(4)-H(4A)   | 109.7      |
| C(9)-Cu-C(6)      | 88.3(2)    | C(5)-C(4)-H(4B)   | 109.7      |
| C(9)#1-Cu-C(6)    | 124.6(2)   | C(3)-C(4)-H(4B)   | 109.7      |
| C(2)-Cu-C(6)      | 119.58(16) | H(4A)-C(4)-H(4B)  | 108.2      |
| C(2)#1-Cu-C(6)    | 81.47(16)  | C(6)-C(5)-C(4)    | 127.9(4)   |

|                  |          |                     |          |
|------------------|----------|---------------------|----------|
| C(6)-C(5)-Cu     | 72.8(2)  | C(10)-C(9)-Cu       | 72.1(2)  |
| C(4)-C(5)-Cu     | 100.7(3) | C(8)-C(9)-Cu        | 99.7(4)  |
| C(6)-C(5)-H(5A)  | 114.7    | C(10)-C(9)-H(9A)    | 114.9    |
| C(4)-C(5)-H(5A)  | 114.7    | C(8)-C(9)-H(9A)     | 114.9    |
| Cu-C(5)-H(5A)    | 114.7    | Cu-C(9)-H(9A)       | 114.9    |
| C(5)-C(6)-C(7)   | 125.4(4) | C(9)-C(10)-C(11)    | 125.7(6) |
| C(5)-C(6)-Cu     | 70.2(2)  | C(9)-C(10)-Cu       | 71.0(2)  |
| C(7)-C(6)-Cu     | 101.2(4) | C(11)-C(10)-Cu      | 101.0(3) |
| C(5)-C(6)-H(6A)  | 115.9    | C(9)-C(10)-H(10A)   | 115.7    |
| C(7)-C(6)-H(6A)  | 115.9    | C(11)-C(10)-H(10A)  | 115.7    |
| Cu-C(6)-H(6A)    | 115.9    | Cu-C(10)-H(10A)     | 115.7    |
| C(8)-C(7)-C(6)   | 112.2(6) | C(10)-C(11)-C(12)   | 112.3(6) |
| C(8)-C(7)-H(7A)  | 109.2    | C(10)-C(11)-H(11A)  | 109.1    |
| C(6)-C(7)-H(7A)  | 109.2    | C(12)-C(11)-H(11A)  | 109.1    |
| C(8)-C(7)-H(7B)  | 109.2    | C(10)-C(11)-H(11B)  | 109.1    |
| C(6)-C(7)-H(7B)  | 109.2    | C(12)-C(11)-H(11B)  | 109.1    |
| H(7A)-C(7)-H(7B) | 107.9    | H(11A)-C(11)-H(11B) | 107.9    |
| C(9)-C(8)-C(7)   | 110.2(6) | C(1)-C(12)-C(11)    | 108.8(5) |
| C(9)-C(8)-H(8A)  | 109.6    | C(1)-C(12)-H(12A)   | 109.9    |
| C(7)-C(8)-H(8A)  | 109.6    | C(11)-C(12)-H(12A)  | 109.9    |
| C(9)-C(8)-H(8B)  | 109.6    | C(1)-C(12)-H(12B)   | 109.9    |
| C(7)-C(8)-H(8B)  | 109.6    | C(11)-C(12)-H(12B)  | 109.9    |
| H(8A)-C(8)-H(8B) | 108.1    | H(12A)-C(12)-H(12B) | 108.3    |
| C(10)-C(9)-C(8)  | 127.9(5) |                     |          |

---

Symmetry transformations used to generate equivalent atoms:

#1 x,-y+1/2,z

**Figure S3.** Several views of  $[\text{Cu}(\text{tft-cdt})(\text{FSbF}_5)]$  (left) and  $[\text{Cu}(\text{tft-cdt})]^+$  moiety (right). H-atoms have been removed for clarity in some views

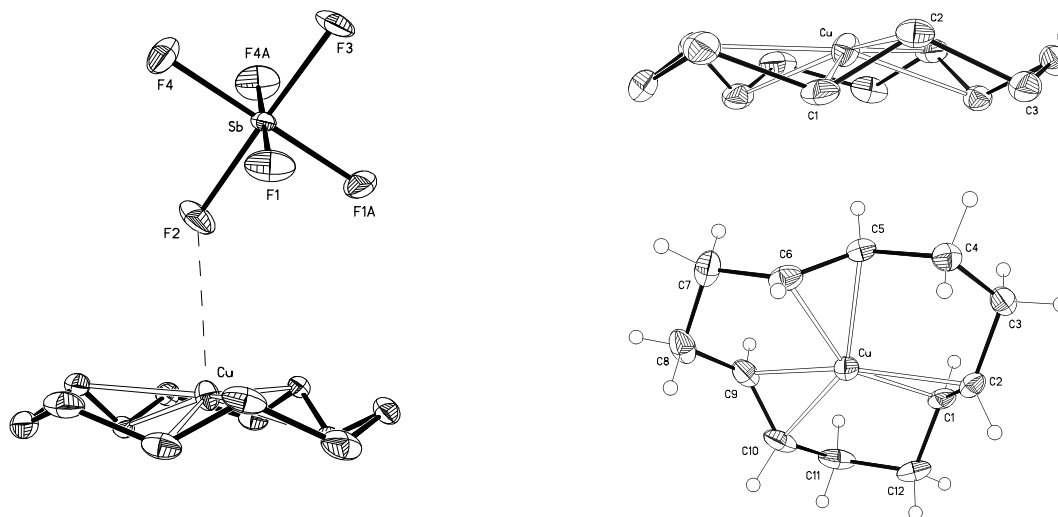



Table S4. Crystal data and structure refinement for [Cu(*ttt*-cdt)(CO)][SbF<sub>6</sub>].

|                                   |                                                        |          |
|-----------------------------------|--------------------------------------------------------|----------|
| Identification code               | dias587s                                               |          |
| Empirical formula                 | C <sub>13</sub> H <sub>18</sub> Cu F <sub>6</sub> O Sb |          |
| Formula weight                    | 489.56                                                 |          |
| Temperature                       | 100(2) K                                               |          |
| Wavelength                        | 0.71073 Å                                              |          |
| Crystal system                    | Cubic                                                  |          |
| Space group                       | P2(1)3                                                 |          |
| Unit cell dimensions              | a = 11.7046(12) Å                                      | α = 90°. |
|                                   | b = 11.7046(12) Å                                      | β = 90°. |
|                                   | c = 11.7046(12) Å                                      | γ = 90°. |
| Volume                            | 1603.5(3) Å <sup>3</sup>                               |          |
| Z                                 | 4                                                      |          |
| Density (calculated)              | 2.028 Mg/m <sup>3</sup>                                |          |
| Absorption coefficient            | 3.069 mm <sup>-1</sup>                                 |          |
| F(000)                            | 952                                                    |          |
| Crystal size                      | 0.22 x 0.20 x 0.18 mm <sup>3</sup>                     |          |
| Theta range for data collection   | 2.46 to 28.31°.                                        |          |
| Index ranges                      | -15 ≤ h ≤ 15, -15 ≤ k ≤ 15, -15 ≤ l ≤ 15               |          |
| Reflections collected             | 15645                                                  |          |
| Independent reflections           | 1340 [R(int) = 0.0217]                                 |          |
| Completeness to theta = 28.31°    | 100.0 %                                                |          |
| Absorption correction             | Semi-empirical from equivalents                        |          |
| Max. and min. transmission        | 0.6081 and 0.5517                                      |          |
| Refinement method                 | Full-matrix least-squares on F <sup>2</sup>            |          |
| Data / restraints / parameters    | 1340 / 7 / 103                                         |          |
| Goodness-of-fit on F <sup>2</sup> | 1.111                                                  |          |
| Final R indices [I > 2σ(I)]       | R1 = 0.0168, wR2 = 0.0428                              |          |
| R indices (all data)              | R1 = 0.0168, wR2 = 0.0428                              |          |
| Absolute structure parameter      | 0.03(2)                                                |          |
| Largest diff. peak and hole       | 0.537 and -0.229 e.Å <sup>-3</sup>                     |          |

Table S5. Bond lengths [Å] and angles [°] for [Cu(*ttt*-cdt)(CO)][SbF<sub>6</sub>].

|               |            |               |          |
|---------------|------------|---------------|----------|
| Cu-C(5)       | 1.942(4)   | C(1A)-C(2A)   | 1.517(6) |
| Cu-C(4B)#1    | 2.238(5)   | C(1A)-H(1AA)  | 1.0000   |
| Cu-C(4B)      | 2.238(5)   | C(2A)-C(3A)   | 1.528(7) |
| Cu-C(4B)#2    | 2.238(5)   | C(2A)-H(2AA)  | 0.9900   |
| Cu-C(1B)#2    | 2.254(5)   | C(2A)-H(2AB)  | 0.9900   |
| Cu-C(1B)      | 2.254(5)   | C(3A)-C(4A)   | 1.510(6) |
| Cu-C(1B)#1    | 2.254(5)   | C(3A)-H(3AA)  | 0.9900   |
| Cu-C(4A)#1    | 2.266(4)   | C(3A)-H(3AB)  | 0.9900   |
| Cu-C(4A)      | 2.266(4)   | C(4A)-C(1A)#1 | 1.361(7) |
| Cu-C(4A)#2    | 2.266(4)   | C(4A)-H(4AA)  | 1.0000   |
| Cu-C(1A)#2    | 2.267(5)   | C(1B)-C(4B)#2 | 1.328(8) |
| Cu-C(1A)      | 2.267(5)   | C(1B)-C(2B)   | 1.514(6) |
| Sb-F(2)       | 1.8590(17) | C(1B)-H(1BA)  | 1.0000   |
| Sb-F(2)#3     | 1.8590(17) | C(2B)-C(3B)   | 1.522(8) |
| Sb-F(2)#4     | 1.8590(17) | C(2B)-H(2BA)  | 0.9900   |
| Sb-F(1)       | 1.8754(16) | C(2B)-H(2BB)  | 0.9900   |
| Sb-F(1)#3     | 1.8754(16) | C(3B)-C(4B)   | 1.515(7) |
| Sb-F(1)#4     | 1.8754(16) | C(3B)-H(3BA)  | 0.9900   |
| O-C(5)        | 1.126(5)   | C(3B)-H(3BB)  | 0.9900   |
| C(1A)-C(4A)#2 | 1.361(7)   | C(4B)-C(1B)#1 | 1.328(8) |

|                    |            |                      |            |
|--------------------|------------|----------------------|------------|
| C(4B)-H(4BA)       | 1.0000     |                      |            |
| C(5)-Cu-C(4B)#1    | 120.59(15) | C(4A)#2-Cu-C(1A)#2   | 81.74(17)  |
| C(5)-Cu-C(4B)      | 120.59(15) | C(5)-Cu-C(1A)        | 122.77(12) |
| C(4B)#1-Cu-C(4B)   | 96.4(2)    | C(4B)#1-Cu-C(1A)     | 107.15(19) |
| C(5)-Cu-C(4B)#2    | 120.59(15) | C(4B)-Cu-C(1A)       | 79.96(16)  |
| C(4B)#1-Cu-C(4B)#2 | 96.4(2)    | C(4B)#2-Cu-C(1A)     | 18.79(15)  |
| C(4B)-Cu-C(4B)#2   | 96.4(2)    | C(1B)#2-Cu-C(1A)     | 100.34(19) |
| C(5)-Cu-C(1B)#2    | 101.92(14) | C(1B)-Cu-C(1A)       | 22.51(16)  |
| C(4B)#1-Cu-C(1B)#2 | 34.4(2)    | C(1B)#1-Cu-C(1A)     | 114.1(2)   |
| C(4B)-Cu-C(1B)#2   | 129.3(2)   | C(4A)#1-Cu-C(1A)     | 126.8(2)   |
| C(4B)#2-Cu-C(1B)#2 | 82.9(2)    | C(4A)-Cu-C(1A)       | 81.74(16)  |
| C(5)-Cu-C(1B)      | 101.92(14) | C(4A)#2-Cu-C(1A)     | 34.95(18)  |
| C(4B)#1-Cu-C(1B)   | 129.3(2)   | C(1A)#2-Cu-C(1A)     | 93.47(16)  |
| C(4B)-Cu-C(1B)     | 82.9(2)    | F(2)-Sb-F(2)#3       | 91.19(11)  |
| C(4B)#2-Cu-C(1B)   | 34.4(2)    | F(2)-Sb-F(2)#4       | 91.19(11)  |
| C(1B)#2-Cu-C(1B)   | 115.85(10) | F(2)#3-Sb-F(2)#4     | 91.19(11)  |
| C(5)-Cu-C(1B)#1    | 101.92(14) | F(2)-Sb-F(1)         | 177.40(10) |
| C(4B)#1-Cu-C(1B)#1 | 82.9(2)    | F(2)#3-Sb-F(1)       | 91.41(10)  |
| C(4B)-Cu-C(1B)#1   | 34.4(2)    | F(2)#4-Sb-F(1)       | 88.73(10)  |
| C(4B)#2-Cu-C(1B)#1 | 129.3(2)   | F(2)-Sb-F(1)#3       | 88.73(10)  |
| C(1B)#2-Cu-C(1B)#1 | 115.85(10) | F(2)#3-Sb-F(1)#3     | 177.40(10) |
| C(1B)-Cu-C(1B)#1   | 115.85(10) | F(2)#4-Sb-F(1)#3     | 91.41(10)  |
| C(5)-Cu-C(4A)#1    | 102.96(15) | F(1)-Sb-F(1)#3       | 88.67(8)   |
| C(4B)#1-Cu-C(4A)#1 | 19.72(16)  | F(2)-Sb-F(1)#4       | 91.41(10)  |
| C(4B)-Cu-C(4A)#1   | 100.3(2)   | F(2)#3-Sb-F(1)#4     | 88.73(10)  |
| C(4B)#2-Cu-C(4A)#1 | 114.9(2)   | F(2)#4-Sb-F(1)#4     | 177.40(10) |
| C(1B)#2-Cu-C(4A)#1 | 39.83(19)  | F(1)-Sb-F(1)#4       | 88.67(8)   |
| C(1B)-Cu-C(4A)#1   | 148.7(2)   | F(1)#3-Sb-F(1)#4     | 88.67(8)   |
| C(1B)#1-Cu-C(4A)#1 | 76.98(18)  | O-C(5)-Cu            | 180.0(5)   |
| C(5)-Cu-C(4A)      | 102.96(15) | C(4A)#2-C(1A)-C(2A)  | 126.0(5)   |
| C(4B)#1-Cu-C(4A)   | 114.9(2)   | C(4A)#2-C(1A)-Cu     | 72.5(3)    |
| C(4B)-Cu-C(4A)     | 19.72(16)  | C(2A)-C(1A)-Cu       | 96.1(3)    |
| C(4B)#2-Cu-C(4A)   | 100.3(2)   | C(4A)#2-C(1A)-H(1AA) | 116.1      |
| C(1B)#2-Cu-C(4A)   | 148.7(2)   | C(2A)-C(1A)-H(1AA)   | 116.1      |
| C(1B)-Cu-C(4A)     | 76.98(18)  | Cu-C(1A)-H(1AA)      | 116.1      |
| C(1B)#1-Cu-C(4A)   | 39.83(19)  | C(1A)-C(2A)-C(3A)    | 110.7(5)   |
| C(4A)#1-Cu-C(4A)   | 115.12(11) | C(1A)-C(2A)-H(2AA)   | 109.5      |
| C(5)-Cu-C(4A)#2    | 102.96(15) | C(3A)-C(2A)-H(2AA)   | 109.5      |
| C(4B)#1-Cu-C(4A)#2 | 100.3(2)   | C(1A)-C(2A)-H(2AB)   | 109.5      |
| C(4B)-Cu-C(4A)#2   | 114.9(2)   | C(3A)-C(2A)-H(2AB)   | 109.5      |
| C(4B)#2-Cu-C(4A)#2 | 19.72(16)  | H(2AA)-C(2A)-H(2AB)  | 108.1      |
| C(1B)#2-Cu-C(4A)#2 | 76.98(18)  | C(4A)-C(3A)-C(2A)    | 111.9(5)   |
| C(1B)-Cu-C(4A)#2   | 39.83(19)  | C(4A)-C(3A)-H(3AA)   | 109.2      |
| C(1B)#1-Cu-C(4A)#2 | 148.7(2)   | C(2A)-C(3A)-H(3AA)   | 109.2      |
| C(4A)#1-Cu-C(4A)#2 | 115.12(11) | C(4A)-C(3A)-H(3AB)   | 109.2      |
| C(4A)-Cu-C(4A)#2   | 115.12(11) | C(2A)-C(3A)-H(3AB)   | 109.2      |
| C(5)-Cu-C(1A)#2    | 122.77(12) | H(3AA)-C(3A)-H(3AB)  | 107.9      |
| C(4B)#1-Cu-C(1A)#2 | 18.79(15)  | C(1A)#1-C(4A)-C(3A)  | 122.4(5)   |
| C(4B)-Cu-C(1A)#2   | 107.15(19) | C(1A)#1-C(4A)-Cu     | 72.6(3)    |
| C(4B)#2-Cu-C(1A)#2 | 79.96(16)  | C(3A)-C(4A)-Cu       | 105.8(3)   |
| C(1B)#2-Cu-C(1A)#2 | 22.51(16)  | C(1A)#1-C(4A)-H(4AA) | 115.7      |
| C(1B)-Cu-C(1A)#2   | 114.1(2)   | C(3A)-C(4A)-H(4AA)   | 115.7      |
| C(1B)#1-Cu-C(1A)#2 | 100.34(19) | Cu-C(4A)-H(4AA)      | 115.7      |
| C(4A)#1-Cu-C(1A)#2 | 34.95(18)  | C(4B)#2-C(1B)-C(2B)  | 124.2(6)   |
| C(4A)-Cu-C(1A)#2   | 126.8(2)   | C(4B)#2-C(1B)-Cu     | 72.1(3)    |

|                      |          |                      |          |
|----------------------|----------|----------------------|----------|
| C(2B)-C(1B)-Cu       | 105.2(4) | C(4B)-C(3B)-H(3BA)   | 109.3    |
| C(4B)#2-C(1B)-H(1BA) | 115.3    | C(2B)-C(3B)-H(3BA)   | 109.3    |
| C(2B)-C(1B)-H(1BA)   | 115.3    | C(4B)-C(3B)-H(3BB)   | 109.3    |
| Cu-C(1B)-H(1BA)      | 115.3    | C(2B)-C(3B)-H(3BB)   | 109.3    |
| C(1B)-C(2B)-C(3B)    | 112.0(5) | H(3BA)-C(3B)-H(3BB)  | 108.0    |
| C(1B)-C(2B)-H(2BA)   | 109.2    | C(1B)#1-C(4B)-C(3B)  | 129.0(6) |
| C(3B)-C(2B)-H(2BA)   | 109.2    | C(1B)#1-C(4B)-Cu     | 73.5(3)  |
| C(1B)-C(2B)-H(2BB)   | 109.2    | C(3B)-C(4B)-Cu       | 96.8(4)  |
| C(3B)-C(2B)-H(2BB)   | 109.2    | C(1B)#1-C(4B)-H(4BA) | 114.7    |
| H(2BA)-C(2B)-H(2BB)  | 107.9    | C(3B)-C(4B)-H(4BA)   | 114.7    |
| C(4B)-C(3B)-C(2B)    | 111.5(5) | Cu-C(4B)-H(4BA)      | 114.7    |

Symmetry transformations used to generate equivalent atoms:

#1  $-z+1, x-1/2, -y+1/2$  #2  $y+1/2, -z+1/2, -x+1$  #3  $-z+3/2, -x+1, y+1/2$

#4  $-y+1, z-1/2, -x+3/2$

**Figure S4.** A view of  $[\text{Cu}(\text{ttt-cdt})(\text{CO})][\text{SbF}_6]$  (left) and the  $[\text{Cu}(\text{ttt-cdt})(\text{CO})]^+$  (right)

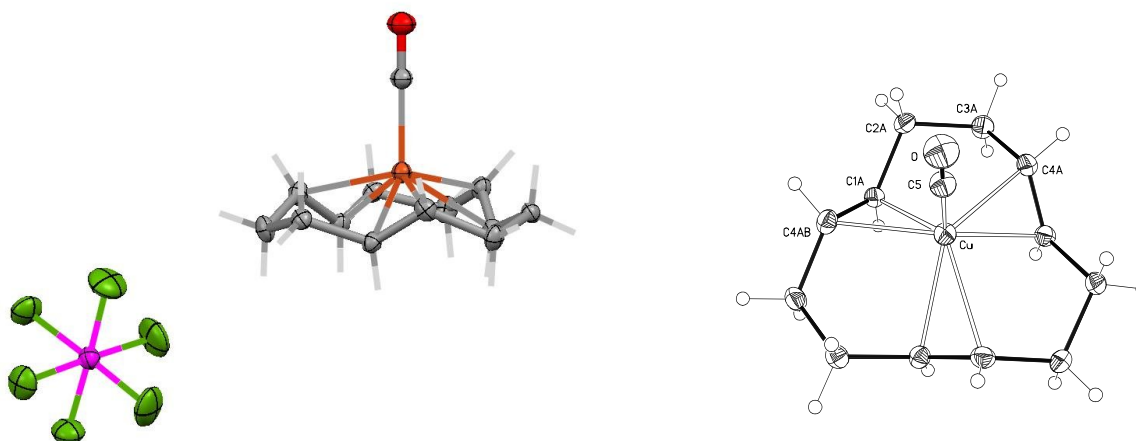

## Computational Methods

All quantum calculations employed the Gaussian03 package.<sup>i</sup> The BP86 functional was employed in conjunction with the Stevens (SBK<sup>ii</sup>) valence basis sets and effective core potentials for the coinage metals. The SBK scheme utilizes a semi-core approximation for transition metals. The standard SBK valence basis set is triplet-zeta for transition metals. The valence basis sets of the transition metals were augmented with the Couty-Hall p functions<sup>iii</sup> (fully uncontracted) and the f polarization functions published by Frenking and coworkers.<sup>iv</sup> The 6-311++G(d,p) basis sets was utilized to model carbon and hydrogen atoms.

All complexes modeled were closed-shell (diamagnetic) species and were modeled within the restricted Kohn-Sham formalism. All systems were fully optimized and analytic calculations of the energy Hessian were performed to confirm species as minima to obtain calculated enthalpies and free energies (determined using unscaled vibrational frequencies) in the gas phase at 1 atm and 298.15 K. The calculated NMR properties employed the GIAO approximation.

---

<sup>i</sup> Gaussian 03, Revision C.02, Frisch, M. J.; Trucks, G. W.; Schlegel, H. B.; Scuseria, G. E.; Robb, M. A.; Cheeseman, J. R.; Montgomery, Jr., J. A.; Vreven, T.; Kudin, K. N.; Burant, J. C.; Millam, J. M.; Iyengar, S. S.; Tomasi, J.; Barone, V.; Mennucci, B.; Cossi, M.; Scalmani, G.; Rega, N.; Petersson, G. A.; Nakatsuji, H.; Hada, M.; Ehara, M.; Toyota, K.; Fukuda, R.; Hasegawa, J.; Ishida, M.; Nakajima, T.; Honda, Y.; Kitao, O.; Nakai, H.; Klene, M.; Li, X.; Knox, J. E.; Hratchian, H. P.; Cross, J. B.; Bakken, V.; Adamo, C.; Jaramillo, J.; Gomperts, R.; Stratmann, R. E.; Yazyev, O.; Austin, A. J.; Cammi, R.; Pomelli, C.; Ochterski, J. W.; Ayala, P. Y.; Morokuma, K.; Voth, G. A.; Salvador, P.; Dannenberg, J. J.; Zakrzewski, V. G.; Dapprich, S.; Daniels, A. D.; Strain, M. C.; Farkas, O.; Malick, D. K.; Rabuck, A. D.; Raghavachari, K.; Foresman, J. B.; Ortiz, J. V.; Cui, Q.; Baboul, A. G.; Clifford, S.; Cioslowski, J.; Stefanov, B. B.; Liu, G.; Liashenko, A.; Piskorz, P.; Komaromi, I.; Martin, R. L.; Fox, D. J.; Keith, T.; Al-Laham, M. A.; Peng, C. Y.; Nanayakkara, A.; Challacombe, M.; Gill, P. M. W.; Johnson, B.; Chen, W.; Wong, M. W.; Gonzalez, C.; and Pople, J. A.; Gaussian, Inc., Wallingford CT, 2004.

<sup>ii</sup> Stevens, W. J.; Krauss, M.; Basch, H.; Jasien, P. G. *Can. J. Chem.* **1992**, *70*, 612 - 630.

<sup>iii</sup> Couty, M.; Hall, M. B. *J. Comp. Chem.* **1996**, *17*, 1359-1370.

<sup>iv</sup> Frenking, G.; Ehlers, A. W.; Boehme, M.; Dapprich, S.; Gobbi, A.; Hoellwarth, A.; Jonas, V.; Koehler, K. F.; Stegmann, R.; Veldkamp, A. *Chem. Phys. Lett.* **1993**, *208*, 111-114.

---

**Table S5.** Cartesian coordinates (Å) of computed structures.

**CO**

|   | x        | y        | z         |
|---|----------|----------|-----------|
| O | 0.000000 | 0.000000 | 0.488494  |
| C | 0.000000 | 0.000000 | -0.651325 |

**CuCO<sup>+</sup>**

|    |          |          |           |
|----|----------|----------|-----------|
| Cu | 0.000000 | 0.000000 | 0.806667  |
| C  | 0.000000 | 0.000000 | -1.024513 |
| O  | 0.000000 | 0.000000 | -2.155782 |

**SbF<sub>6</sub><sup>-</sup>**

|    |           |           |           |
|----|-----------|-----------|-----------|
| Sb | 0.000000  | 0.000000  | 0.000115  |
| F  | 0.000000  | 1.939767  | 0.000038  |
| F  | 1.939767  | 0.000000  | 0.000038  |
| F  | 0.000000  | 0.000000  | -1.939296 |
| F  | -1.939767 | 0.000000  | 0.000038  |
| F  | 0.000000  | -1.939767 | 0.000038  |
| F  | 0.000000  | 0.000000  | 1.938490  |

***ttt*-cdt free ligand**

|   |           |           |           |
|---|-----------|-----------|-----------|
| C | 1.765299  | 1.213234  | -0.358900 |
| H | 1.711352  | 1.272275  | -1.456118 |
| C | 2.795722  | 0.268607  | 0.199374  |
| H | 2.823846  | 0.354239  | 1.300425  |
| C | 2.527486  | -1.214992 | -0.198246 |
| H | 2.521978  | -1.304536 | -1.299274 |
| H | 3.375513  | -1.824941 | 0.166133  |
| C | 1.232770  | -1.740630 | 0.361046  |
| H | 1.157503  | -1.766267 | 1.458309  |
| C | 0.167746  | -2.118279 | -0.363898 |
| C | -1.162402 | -2.548818 | 0.193777  |
| H | -1.100159 | -2.622386 | 1.294257  |
| H | -1.422237 | -3.557917 | -0.178028 |
| C | -2.319417 | -1.579831 | -0.195943 |
| H | -2.402122 | -1.530377 | -1.296411 |
| H | -3.267589 | -2.012685 | 0.174936  |
| C | -2.127957 | -0.195089 | 0.362399  |
| H | -2.104403 | -0.117188 | 1.459477  |
| C | -1.929224 | 0.916887  | -0.363288 |

---

|   |           |           |           |
|---|-----------|-----------|-----------|
| H | -1.931925 | 0.835091  | -1.460327 |
| C | -1.630136 | 2.282912  | 0.194403  |
| H | -1.725360 | 2.265857  | 1.294872  |
| H | -2.369724 | 3.016875  | -0.177360 |
| C | -0.209405 | 2.790552  | -0.195007 |
| H | 0.124117  | 2.834673  | -1.295534 |
| H | -0.103544 | 3.828276  | 0.173961  |
| C | 0.888341  | 1.926661  | 0.365300  |
| H | 0.928427  | 1.850425  | 1.462049  |
| H | 3.802842  | 0.543553  | -0.166557 |
| H | 0.236781  | -2.072259 | -1.460924 |

**Cu(*ttt*-cdt)<sup>+</sup>**

|    |             |             |             |
|----|-------------|-------------|-------------|
| Cu | 0.00000000  | 0.00000000  | 0.00348800  |
| C  | -0.99678500 | 1.84469400  | -0.36382900 |
| H  | -1.09685700 | 1.83046700  | -1.46134900 |
| C  | 0.00000000  | 2.85374000  | 0.19043700  |
| H  | -0.09516700 | 2.91775500  | 1.28769600  |
| C  | 1.45832900  | 2.45234300  | -0.19433800 |
| H  | 1.56991100  | 2.45293300  | -1.29190500 |
| H  | 2.16339100  | 3.20248800  | 0.20287200  |
| C  | 1.80134800  | 1.07815800  | 0.36430300  |
| H  | 1.88442700  | 1.01772800  | 1.46154200  |
| C  | 2.09594400  | -0.05910600 | -0.36382900 |
| C  | 2.47141100  | -1.42687000 | 0.19043700  |
| H  | 2.57443300  | -1.37646100 | 1.28769600  |
| H  | 3.45172200  | -1.73470500 | -0.21201600 |
| C  | 1.39462700  | -2.48912200 | -0.19433800 |
| H  | 1.33934600  | -2.58604900 | -1.29190500 |
| H  | 1.69174000  | -3.47479500 | 0.20287200  |
| C  | 0.03303900  | -2.09909200 | 0.36430300  |
| H  | -0.06083500 | -2.14082600 | 1.46154200  |
| C  | -1.09916000 | -1.78558800 | -0.36382900 |
| H  | -1.03680300 | -1.86513900 | -1.46134900 |
| C  | -2.47141100 | -1.42687000 | 0.19043700  |
| H  | -2.47926700 | -1.54129400 | 1.28769600  |
| H  | -3.22816000 | -2.12192600 | -0.21201600 |
| C  | -2.85295600 | 0.03677900  | -0.19433800 |
| H  | -2.90925800 | 0.13311700  | -1.29190500 |
| H  | -3.85513100 | 0.27230700  | 0.20287200  |
| C  | -1.83438600 | 1.02093400  | 0.36430300  |
| H  | -1.82359200 | 1.12309800  | 1.46154200  |
| H  | -0.22356200 | 3.85663200  | -0.21201600 |
| H  | 2.13365900  | 0.03467200  | -1.46134900 |

---

**Cu(*ttt*-cdt)CO<sup>+</sup>**

|    |             |             |             |
|----|-------------|-------------|-------------|
| Cu | 0.00101400  | 0.00424200  | -0.33910700 |
| O  | -0.00221700 | -0.00153100 | -3.36553400 |
| C  | -0.00081400 | 0.00027900  | -2.22262800 |
| C  | 1.48263100  | 1.21981600  | 0.84937100  |
| H  | 1.27771200  | 0.99003000  | 1.90504100  |
| C  | 1.04433700  | 2.59487300  | 0.39333200  |
| H  | 1.23637900  | 2.72799400  | -0.68461400 |
| C  | -0.45793300 | 2.83675600  | 0.72283500  |
| H  | -0.58173000 | 2.85444600  | 1.81908600  |
| H  | -0.75695900 | 3.82907700  | 0.35049500  |
| C  | -1.37081800 | 1.76982800  | 0.13821400  |
| H  | -1.78273300 | 1.94775400  | -0.86400800 |
| C  | -1.79693000 | 0.67493700  | 0.84736200  |
| C  | -2.76849200 | -0.39289800 | 0.39258800  |
| H  | -2.97954200 | -0.29417400 | -0.68552800 |
| H  | -3.73056000 | -0.25136800 | 0.91862900  |
| C  | -2.22625000 | -1.81393800 | 0.72331800  |
| H  | -2.17888900 | -1.92879600 | 1.81960800  |
| H  | -2.93592200 | -2.56989900 | 0.35221200  |
| C  | -0.84612200 | -2.07063800 | 0.13815900  |
| H  | -0.79464900 | -2.51148500 | -0.86626300 |
| C  | 0.31478500  | -1.89789000 | 0.84844000  |
| H  | 0.21799300  | -1.60438400 | 1.90409300  |
| C  | 1.72556700  | -2.20346100 | 0.39340800  |
| H  | 1.74578100  | -2.43660800 | -0.68451700 |
| H  | 2.08551900  | -3.10627100 | 0.92029300  |
| C  | 2.68343400  | -1.02209800 | 0.72377800  |
| H  | 2.76071400  | -0.92399700 | 1.82004400  |
| H  | 3.69289800  | -1.25703300 | 0.35152700  |
| C  | 2.21403600  | 0.30125100  | 0.13919400  |
| H  | 2.57156500  | 0.56741700  | -0.86430600 |
| H  | 1.64713200  | 3.35770000  | 0.91966100  |
| H  | -1.49093600 | 0.61007000  | 1.90168400  |

**Cu(*ttt*-cdt)SbF<sub>6</sub>**

|    |            |             |             |
|----|------------|-------------|-------------|
| Cu | 0.19970100 | 0.33593500  | -0.11617200 |
| C  | 2.31925600 | -0.08814500 | -0.02883800 |
| H  | 2.79235000 | 0.89626600  | 0.11521700  |
| C  | 2.50915100 | -0.69832300 | -1.40766800 |
| H  | 2.03417400 | -1.69190100 | -1.45204400 |
| C  | 1.90266200 | 0.23682400  | -2.49735500 |
| H  | 2.42963900 | 1.20739800  | -2.47945300 |

---

|    |             |             |             |
|----|-------------|-------------|-------------|
| H  | 2.06971000  | -0.20416300 | -3.49507900 |
| C  | 0.41399600  | 0.45576100  | -2.27346800 |
| H  | -0.24766700 | -0.38160300 | -2.53173600 |
| C  | -0.15195900 | 1.62718200  | -1.82225600 |
| C  | -1.63010400 | 1.91003900  | -1.60909100 |
| H  | -2.22411900 | 1.00671300  | -1.82432600 |
| H  | -1.96496200 | 2.69811300  | -2.30877900 |
| C  | -1.88595400 | 2.38072200  | -0.14512000 |
| H  | -1.34223800 | 3.32562400  | 0.03333700  |
| H  | -2.96008700 | 2.59471300  | -0.01244300 |
| C  | -1.44033400 | 1.33432800  | 0.86735100  |
| H  | -2.09880800 | 0.46817800  | 1.02106800  |
| C  | -0.31820500 | 1.44763300  | 1.66025100  |
| H  | 0.26787500  | 2.37722300  | 1.58183900  |
| C  | 0.14809600  | 0.46685100  | 2.72353200  |
| H  | -0.52956500 | -0.40145800 | 2.75520000  |
| H  | 0.11475900  | 0.95220100  | 3.71652900  |
| C  | 1.60712100  | 0.00447400  | 2.43026500  |
| H  | 2.28472000  | 0.87629500  | 2.47143300  |
| H  | 1.93069300  | -0.70025700 | 3.21481300  |
| C  | 1.71506500  | -0.66429000 | 1.06712700  |
| H  | 1.32598900  | -1.69059600 | 0.99715300  |
| H  | 3.58689200  | -0.84048000 | -1.60968900 |
| H  | 0.51853100  | 2.48603000  | -1.66202400 |
| Sb | -1.86230200 | -2.98231600 | 0.39476500  |
| F  | -2.26371100 | -1.68910500 | 1.78419900  |
| F  | -3.46526800 | -2.46564000 | -0.52775800 |
| F  | -2.72114100 | -4.40268400 | 1.33862700  |
| F  | -0.16410200 | -3.30472000 | 1.26700900  |
| F  | -1.32917000 | -4.10445400 | -1.06643100 |
| F  | -0.94459500 | -1.46976400 | -0.52742900 |

**Cu(*ttt*-cdt)CO(SbF<sub>6</sub>)**

|    |             |             |             |
|----|-------------|-------------|-------------|
| Cu | 0.68454000  | -0.77968400 | -2.88861900 |
| O  | 1.86752900  | -0.50996100 | -5.65120400 |
| C  | 1.41774100  | -0.61030300 | -4.60019000 |
| C  | 1.81367800  | -0.14996100 | -1.04350700 |
| H  | 1.14795400  | -0.40450200 | -0.20741900 |
| C  | 1.92870800  | 1.32658800  | -1.35351400 |
| H  | 2.56198000  | 1.49527800  | -2.24260600 |
| H  | 2.42724900  | 1.82691600  | -0.50229200 |
| C  | 0.51926700  | 1.96049400  | -1.53663000 |
| H  | -0.01220000 | 1.89485200  | -0.57431000 |



---

|    |             |             |             |
|----|-------------|-------------|-------------|
| H  | 0.62875100  | 3.02654700  | -1.79415400 |
| C  | -0.31184500 | 1.25626700  | -2.59975600 |
| H  | -0.24882000 | 1.63247100  | -3.63086100 |
| C  | -1.22433000 | 0.27457200  | -2.30247300 |
| H  | -1.37256300 | 0.02048000  | -1.24372800 |
| C  | -2.15620300 | -0.41575800 | -3.27437200 |
| H  | -1.90457200 | -0.15139700 | -4.31694500 |
| H  | -3.18591900 | -0.05705700 | -3.08951400 |
| C  | -2.13037400 | -1.95781900 | -3.06268300 |
| H  | -2.53305400 | -2.17227500 | -2.06041600 |
| H  | -2.78838100 | -2.43857700 | -3.80475700 |
| C  | -0.72974200 | -2.54606500 | -3.15881100 |
| H  | -0.39088500 | -2.90210700 | -4.14217900 |
| C  | 0.05815500  | -2.77269100 | -2.05715600 |
| H  | -0.36884700 | -2.54423100 | -1.07117000 |
| C  | 1.41827900  | -3.43564800 | -2.03915700 |
| H  | 1.80314700  | -3.57431400 | -3.06517000 |
| H  | 1.31306900  | -4.44287000 | -1.59449200 |
| C  | 2.41620000  | -2.61790800 | -1.16913900 |
| H  | 2.05683300  | -2.63651900 | -0.12836900 |
| H  | 3.40648600  | -3.10094200 | -1.19748300 |
| C  | 2.53733100  | -1.16729300 | -1.61510900 |
| H  | 3.31644900  | -0.92108400 | -2.35063800 |
| Sb | -1.36797500 | -1.25570400 | 1.87254300  |
| F  | -1.88370500 | -2.93142400 | 2.64663000  |
| F  | -0.79959100 | 0.37360100  | 0.95545700  |
| F  | -2.99986900 | -0.40404500 | 2.40646600  |
| F  | 0.27544400  | -2.05790400 | 1.18539800  |
| F  | -0.45010500 | -0.69842800 | 3.46018600  |
| F  | -2.17304900 | -1.77350900 | 0.16975500  |

**Table S6.** Olefin tilt of the calculated structures, defined as angle (°) between C=C vector and three-fold rotational axis.

|                                     |      |
|-------------------------------------|------|
| Free <i>ttt</i> -cdt                | 32.6 |
| Cu( <i>ttt</i> -cdt) <sup>+</sup>   | 23.5 |
| CuCO( <i>ttt</i> -cdt) <sup>+</sup> | 26.6 |

---

**Table S7.** Olefin bond distances (Å)

| <i>ttt</i> -cdt               | Cu( <i>ttt</i> -cdt) <sup>+</sup>                            | CuCO( <i>ttt</i> -cdt) <sup>+</sup> |
|-------------------------------|--------------------------------------------------------------|-------------------------------------|
| 1.3501                        | 1.3822                                                       | 1.3723                              |
| 1.3501                        | 1.3822                                                       | 1.3723                              |
| 1.3501                        | 1.3822                                                       | 1.3719                              |
| average                       |                                                              |                                     |
| 1.3501                        | 1.3822                                                       | 1.3722                              |
| C <sub>2</sub> H <sub>4</sub> | Cu(C <sub>2</sub> H <sub>4</sub> ) <sub>3</sub> <sup>+</sup> |                                     |
| 1.338                         | 1.374                                                        |                                     |

**Table S8.** Cu-C=C(centroid) bond distances (Å)**Cu(*ttt*-cdt)<sup>+</sup> complex**

|                                  |
|----------------------------------|
| <i>r</i> <sub>CuC_centroid</sub> |
| 2.12871                          |
| 2.13013                          |
| 2.12871                          |
| 2.13013                          |
| 2.12871                          |
| 2.13013                          |
| average                          |
| 2.12942                          |

**Cu(C<sub>2</sub>H<sub>4</sub>)<sub>3</sub><sup>+</sup> complex**

2.063

**Cu(*ttt*-cdt)CO<sup>+</sup> complex**

|                                  |
|----------------------------------|
| <i>r</i> <sub>CuC_centroid</sub> |
| 2.28627                          |
| 2.25613                          |
| 2.29141                          |
| 2.26425                          |
| 2.25506                          |
| 2.28352                          |
| average                          |
| 2.272773                         |

**Table S9.** C=C frequencies (in  $\text{cm}^{-1}$ )

|                                                              | $\nu_{\text{C}=\text{C}}$ |
|--------------------------------------------------------------|---------------------------|
| Cu( <i>ttt</i> -cdt) <sup>+</sup>                            | 1548 – 1550               |
| Cu( <i>ttt</i> -cdt)CO <sup>+</sup>                          | 1573 – 1576               |
| Free <i>ttt</i> -cdt                                         | 1816 – 1818               |
| Cu(C <sub>2</sub> H <sub>4</sub> ) <sub>3</sub> <sup>+</sup> | 1543 – 1544               |
| Free C <sub>2</sub> H <sub>4</sub>                           | 1632                      |

**Table S10.** NBO Population analysis

|                                                              | $\pi$ population per olefin | $\pi^*$ pop per olefin | C=C Bond order | BO change (free vs. complex) |
|--------------------------------------------------------------|-----------------------------|------------------------|----------------|------------------------------|
| Free <i>ttt</i> -cdt                                         | 1.98                        | 0.06                   | 1.93           | -                            |
| Cu( <i>ttt</i> -cdt) <sup>+</sup>                            | 1.85                        | 0.15                   | 1.84           | 0.09                         |
| Cu( <i>ttt</i> -cdt)CO <sup>+</sup>                          | 1.87                        | 0.14                   | 1.85           | 0.08                         |
| Free C <sub>2</sub> H <sub>4</sub>                           | 2.00                        | 0.00                   | 2.00           | -                            |
| Cu(C <sub>2</sub> H <sub>4</sub> ) <sub>3</sub> <sup>+</sup> | 1.81                        | 0.16                   | 1.82           | 0.18                         |

The bond order is defined as the sum of the NBO calculated  $\sigma_{\text{CC}}$  plus  $\pi_{\text{CC}}$  populations minus the populations of both antibonding counterparts, all divided by 2, *i.e.*,  $\text{BO}_{\text{CC}} = (\text{Pop}_{\sigma} + \text{Pop}_{\pi} - \text{Pop}_{\pi^*} - \text{Pop}_{\sigma^*}) / 2$ . Note that for all cases the NBO-calculated populations of  $\sigma_{\text{CC}}$  and  $\sigma^*_{\text{CC}}$  are close to ideal values of 2.00 and 0.00  $e^-$ , respectively.

**Table S11.** Calculated <sup>13</sup>C chemical shifts (relative to TMS) in ppm.

|                                                              |           |
|--------------------------------------------------------------|-----------|
| Free <i>ttt</i> -cdt                                         | 139 – 140 |
| Cu( <i>ttt</i> -cdt) <sup>+</sup>                            | 141       |
| Cu( <i>ttt</i> -cdt)CO <sup>+</sup>                          | 132 – 135 |
| Free C <sub>2</sub> H <sub>4</sub>                           | 128.5     |
| Cu(C <sub>2</sub> H <sub>4</sub> ) <sub>3</sub> <sup>+</sup> | 100.0     |

---

**Table S12.** Copper NBO partial charge

|                                              | $\text{Cu}(\text{tnt-cdt})^+$ | $\text{CuCO}(\text{tnt-cdt})^+$ | $\text{Cu}(\text{C}_2\text{H}_4)_3^+$ |
|----------------------------------------------|-------------------------------|---------------------------------|---------------------------------------|
| Free cation<br>(i.e., w/o $\text{SbF}_6^-$ ) | 0.881                         | 0.865                           | 0.894                                 |

Calculated data for ethylene and  $[\text{Cu}(\text{C}_2\text{H}_4)_3]^+$  are shown for comparison and is obtained at the same level of theory utilized here for *tnt-cdt* and its complexes. See “Synthesis and characterization of the first gold(I)-tris(ethylene) complex:  $[\text{Au}(\text{C}_2\text{H}_4)_3][\text{SbF}_6]$ ,” H. V. R. Dias, M. Fianchini, T. R. Cundari, C. F. Campana *Angew. Chem., Int. Ed.* **2008**, *47*, 556 - 559.

$^1\text{H}$  NMR spectrum of  $[\text{Cu}(\text{ttt-cdt})(\text{FSbF}_5)]$  (in  $\text{CD}_2\text{Cl}_2$ )

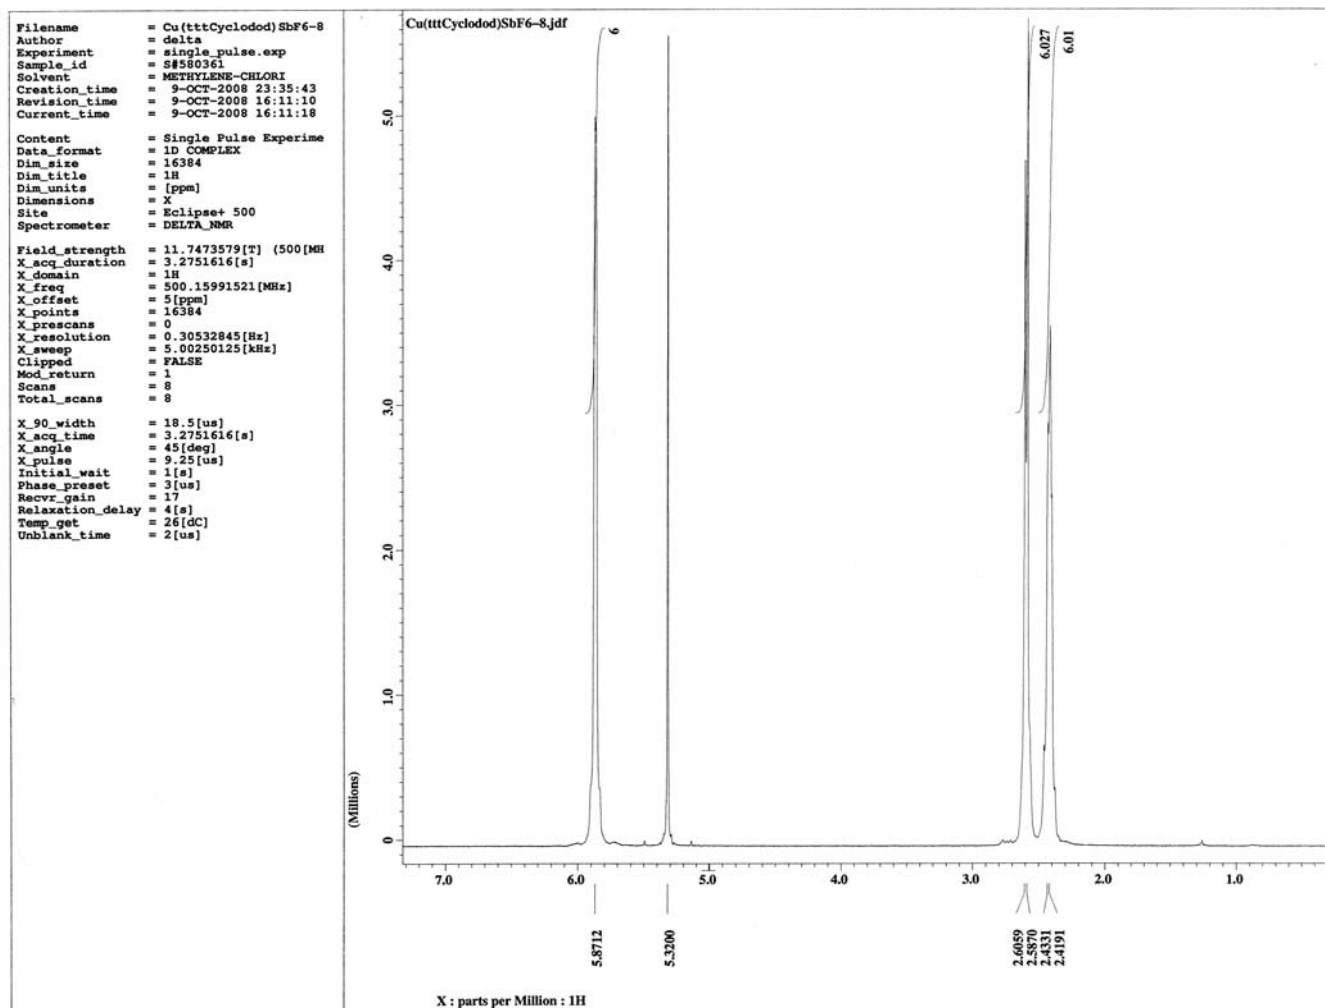

$^{13}\text{C}\{^1\text{H}\}$  NMR spectrum of  $[\text{Cu}(\text{tft-cdt})(\text{FSbF}_5)]$  (in  $\text{CD}_2\text{Cl}_2$ )

```

.filename = Cu(tftCyclodod)SbF6-4
.Author = delta
.Experiment = single_pulse_dec
.Sample_id = S88852
.Solvent = METHYLENE-CHLORI
.Creation_time = 9-OCT-2008 23:58:53
.Revision_time = 9-OCT-2008 16:35:16
.Current_time = 9-OCT-2008 16:35:41

.Content = single pulse decouple
.Data_format = 1D COMPLEX
.Dim_size = 65536
.Dim_title = 13C
.Dim_units = [ppm]
.Dimensions = X
.Site = Eclipse+ 500
.Spectrometer = DELTA_NMR

.Field_strength = 11.7473579[T] (500[MH
.X_acq_duration = 3.7158912[s]
.X_domain = 13C
.X_freq = 125.76529768[MHz]
.X_offset = 70[ppm]
.X_points = 65536
.X_prescans = 4
.X_resolution = 0.26911445[Hz]
.X_sweep = 17.6366843[kHz]
.Irr_domain = 1H
.Irr_freq = 500.15991521[MHz]
.Irr_offset = 5[ppm]
.Clipped = FALSE
.Mod_return = 1
.Scans = 82
.Total_scans = 82

.X_90_width = 14.2[us]
.X_acq_time = 3.7158912[s]
.X_angle = 30[deg]
.X_pulse = 4.73333333[us]
.Initial_wait = 1[s]
.Noe_time = 1[s]
.Phase_preset = 3[us]
.Recvr_gain = 30
.Relaxation_delay = 2[s]
.Temp_get = 28.3[dc]
.Unblank_time = 2[us]

```

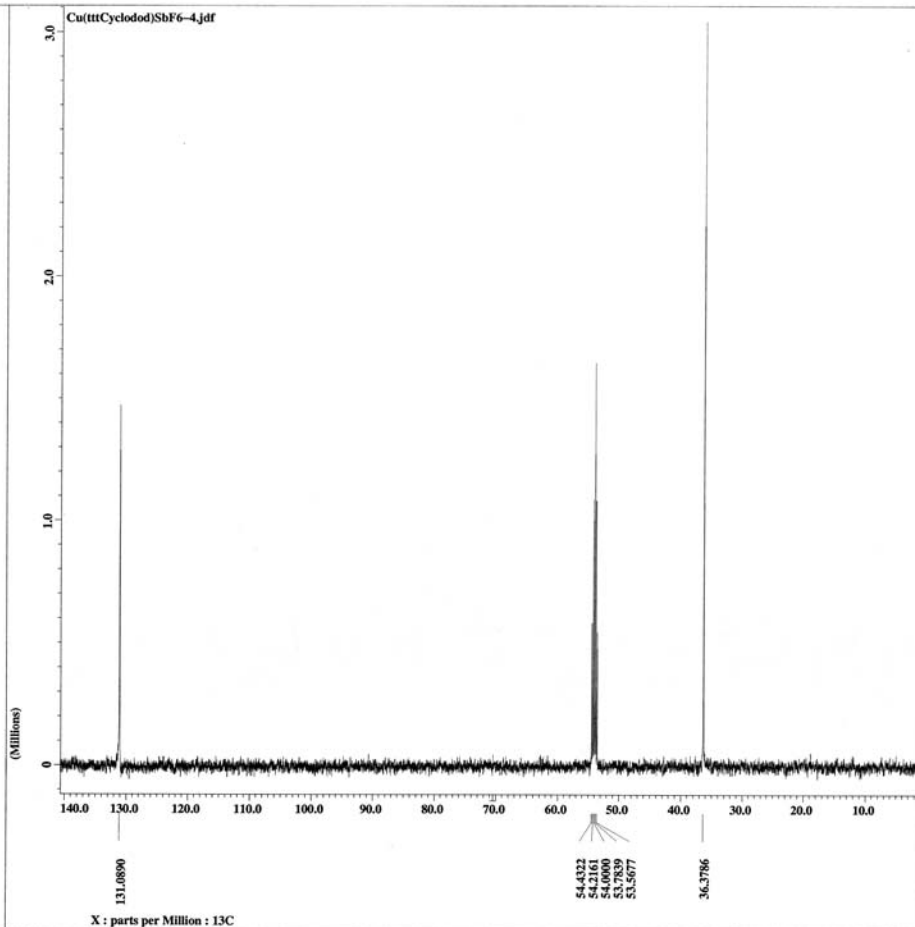

Raman spectrum of [Cu(*ttt*-cdt)(FSbF<sub>5</sub>)] (crystals)

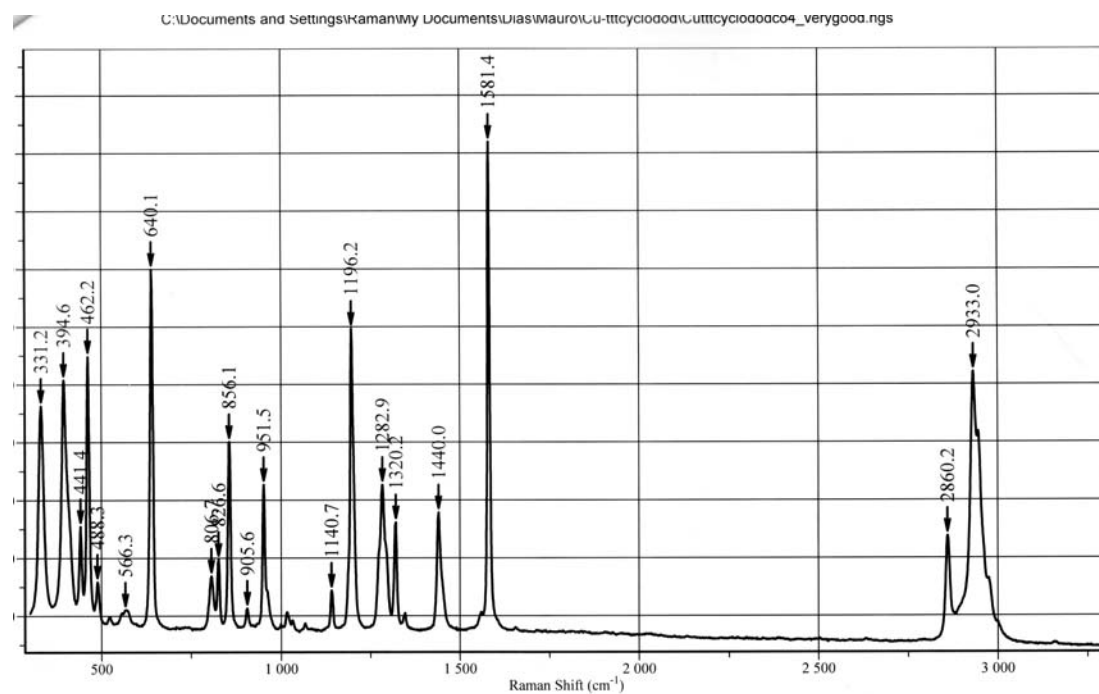

|        |        |          |                                                        |
|--------|--------|----------|--------------------------------------------------------|
| on     | 1      | Slit     | 100                                                    |
| lution | 20     | Operator | Mauro                                                  |
|        | 632.81 | Sample   | [Cu(C <sub>12</sub> H <sub>18</sub> )]SbF <sub>6</sub> |
|        | Multi  | Remark   | 20 accum.                                              |
|        | 200    | Power    | laser633 D0.6                                          |

**HORIBA**JOBIN YVON

$^1\text{H}$  NMR spectrum of  $[\text{Cu}(\text{ttr-cdt})(\text{CO})][\text{SbF}_6]$  (in  $\text{CD}_2\text{Cl}_2$ )

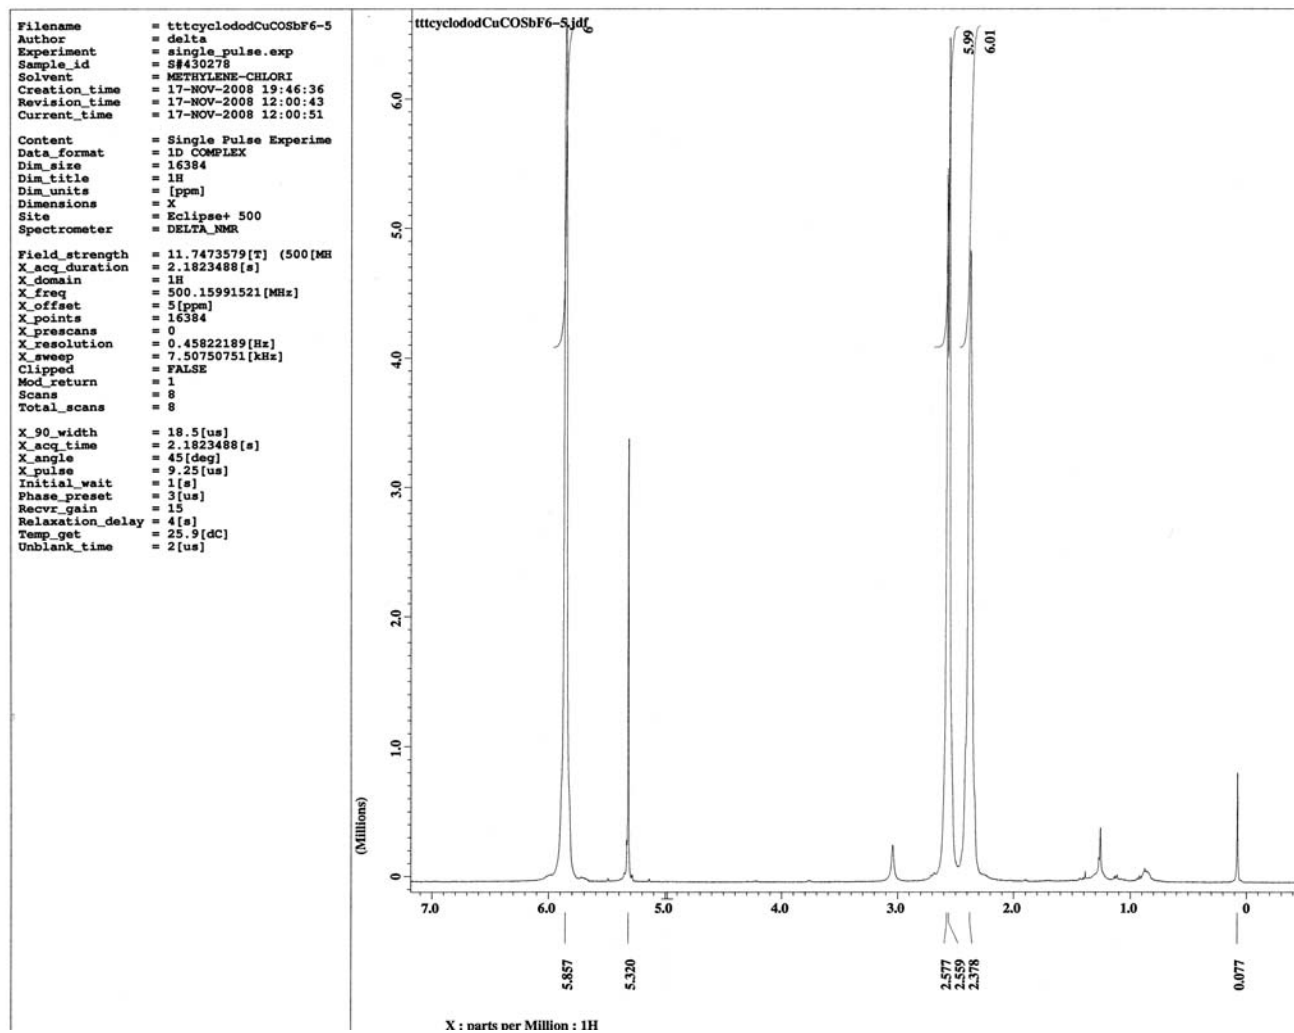



$^{13}\text{C}\{^1\text{H}\}$  NMR spectrum of  $[\text{Cu}(\text{tft-cdt})(\text{CO})][\text{SbF}_6]$  (in  $\text{CD}_2\text{Cl}_2$ )

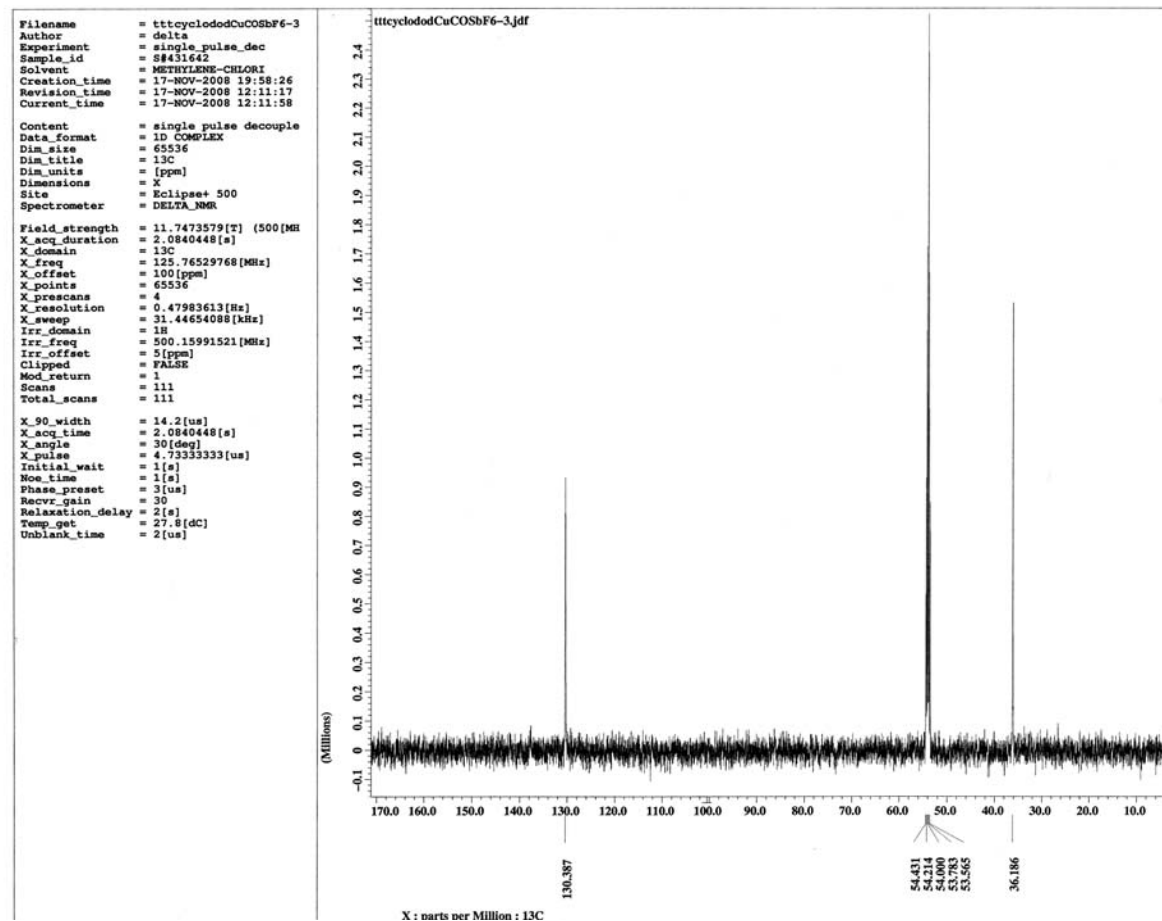

Raman spectrum of [Cu(*ttt*-cdt)(CO)][SbF<sub>6</sub>] (crystals)

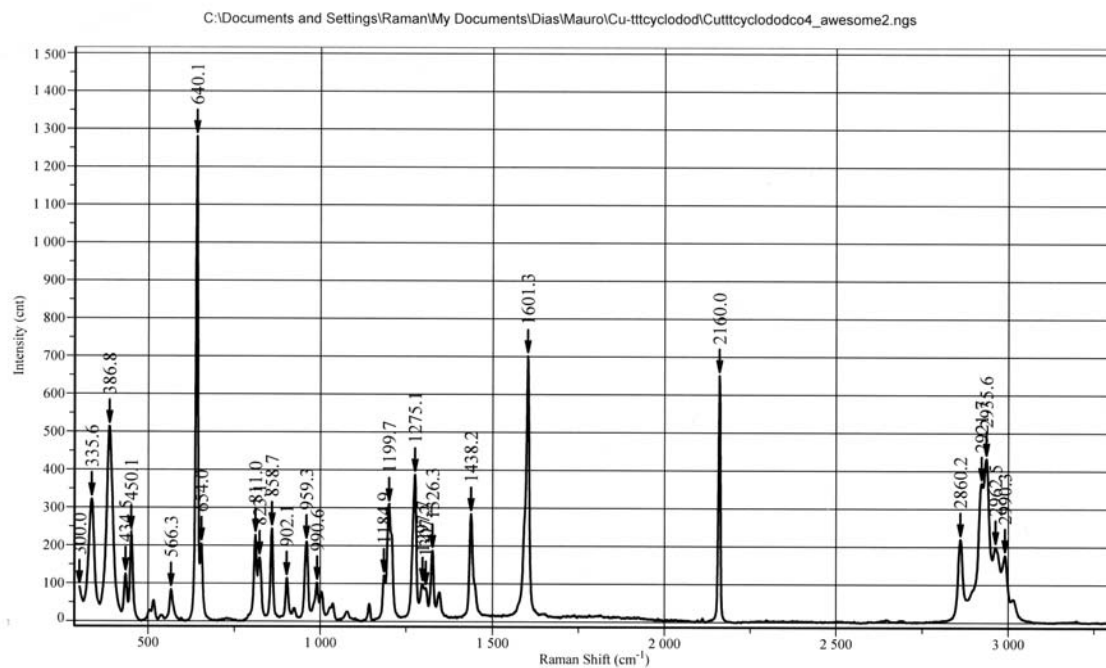

|              |        |          |                                                            |
|--------------|--------|----------|------------------------------------------------------------|
| Exposition   | 1      | Slit     | 100                                                        |
| Accumulation | 100    | Operator | Mauro                                                      |
| Laser        | 632.81 | Sample   | [Cu(C <sub>12</sub> H <sub>18</sub> )(CO)]SbF <sub>6</sub> |
| Spectro      | Multi  | Remark   | 100 accum.                                                 |
| Hole         | 200    | Power    | laser633 full                                              |

HORIBA JOBIN YVON

$^1\text{H}$  NMR spectrum of free *ttt*-cdt (in  $\text{CD}_2\text{Cl}_2$ )

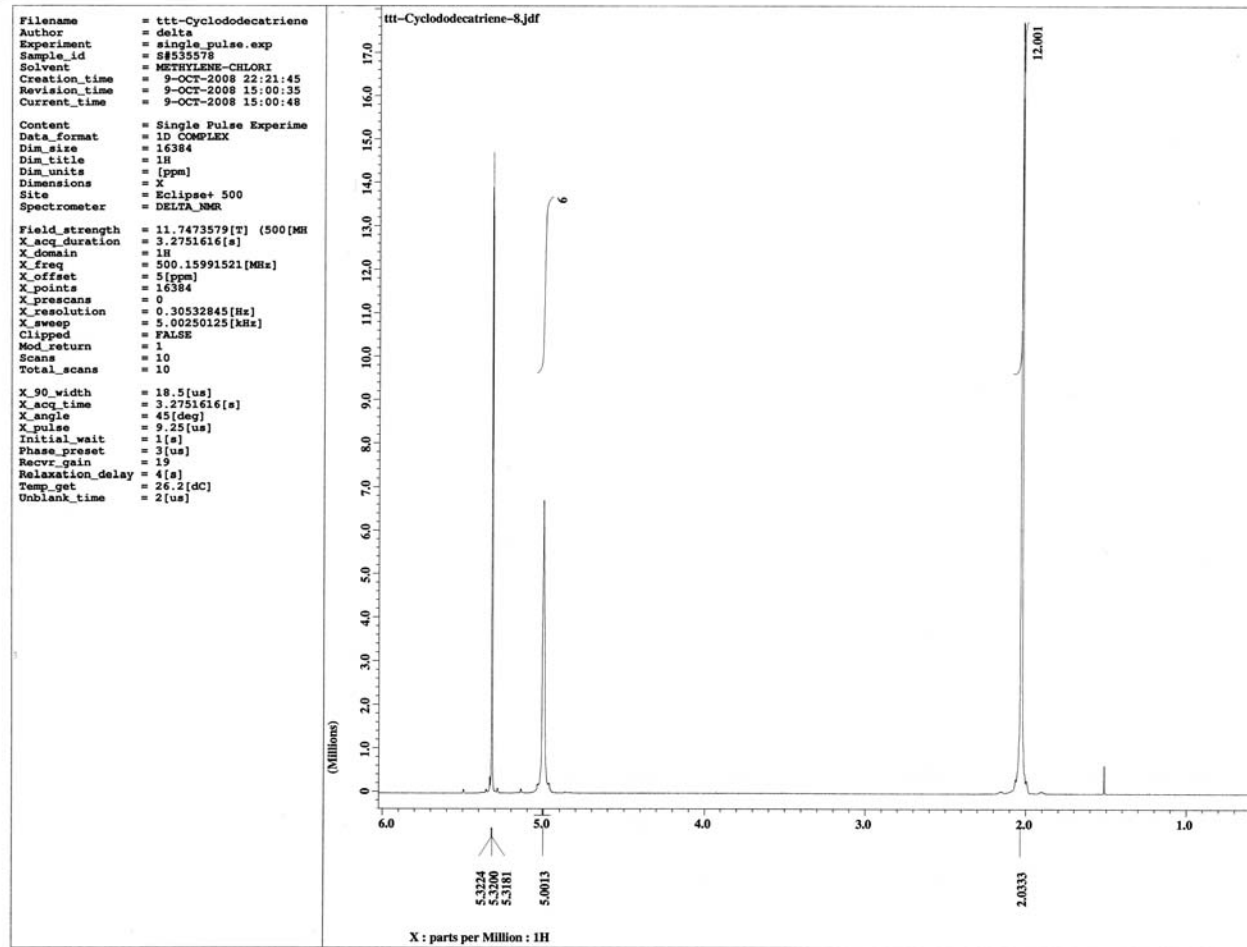

$^{13}\text{C}\{^1\text{H}\}$  NMR spectrum of free *ttt*-cdt (in  $\text{CD}_2\text{Cl}_2$ )

```
Filename      = ttt-Cyclododecatriene
Author        = delta
Experiment    = single_pulse_dec
Sample_id     = S8541970
Solvent       = METHYLENE-CHLORI
Creation_time = 9-OCT-2008 22:35:03
Revision_time = 9-OCT-2008 15:10:53
Current_time  = 9-OCT-2008 15:11:03

Content       = single pulse decouple
Data_format   = 1D COMPLEX
Dim_size      = 65536
Dim_title     = 13C
Dim_units     = [ppm]
Dimensions    = X
Site          = Eclipse+ 500
Spectrometer  = DELTA NMR

Field_strength = 11.7473579[T] (500[MH
X_acq_duration = 3.7158912[s]
X_domain      = 13C
X_freq        = 125.76529768[MHz]
X_offset      = 70 [ppm]
X_points      = 65536
X_prescans    = 4
X_resolution  = 0.26911445[Hz]
X_sweep       = 17.6366843[kHz]
Irr_domain    = 1H
Irr_freq      = 500.15991521[MHz]
Irr_offset    = 5[ppm]
Clipped       = FALSE
Mod_return    = 1
Scans         = 11
Total_scans   = 11

X_90_width    = 14.2[us]
X_acq_time    = 3.7158912[s]
X_angle       = 30[deg]
X_pulse       = 4.73333333[us]
Initial_wait  = 1[s]
Noe_time      = 1[s]
Phase_preset  = 3[us]
Recvr_gain    = 30
Relaxation_delay = 2[s]
Temp_get      = 27.5[dc]
Unblank_time  = 2[us]
```

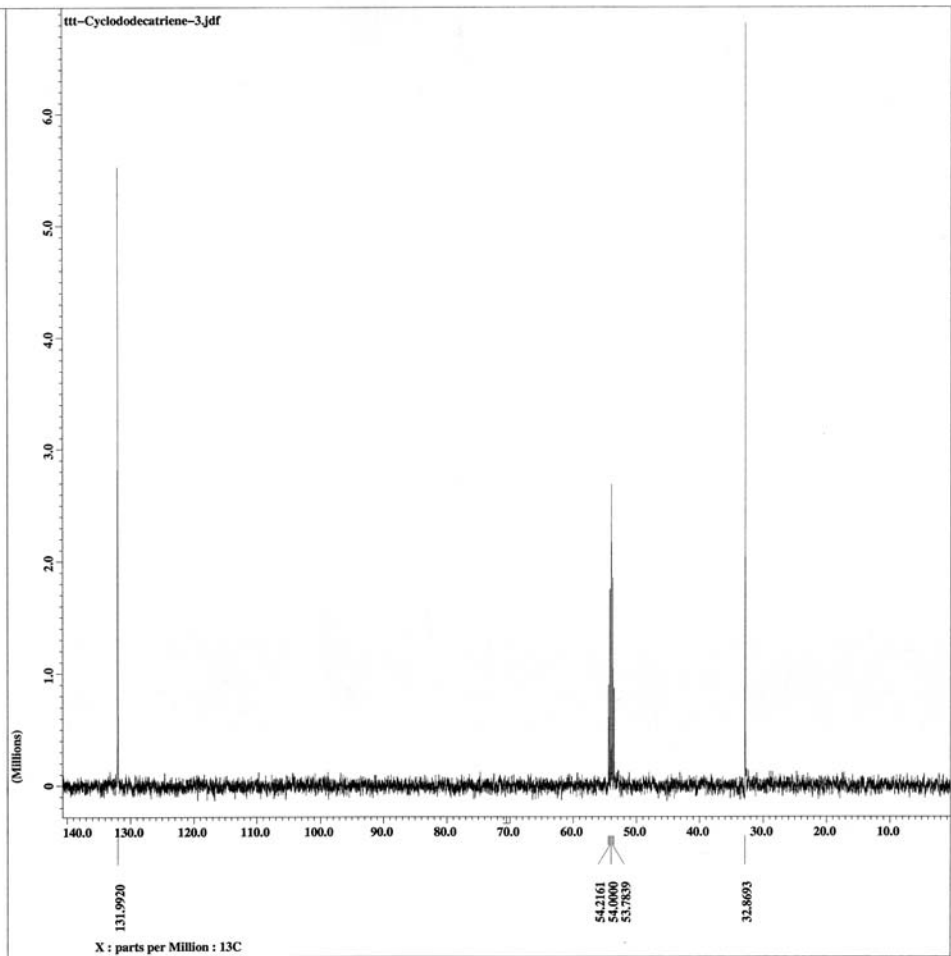

Raman spectrum of free *ttt*-cdt (solid)

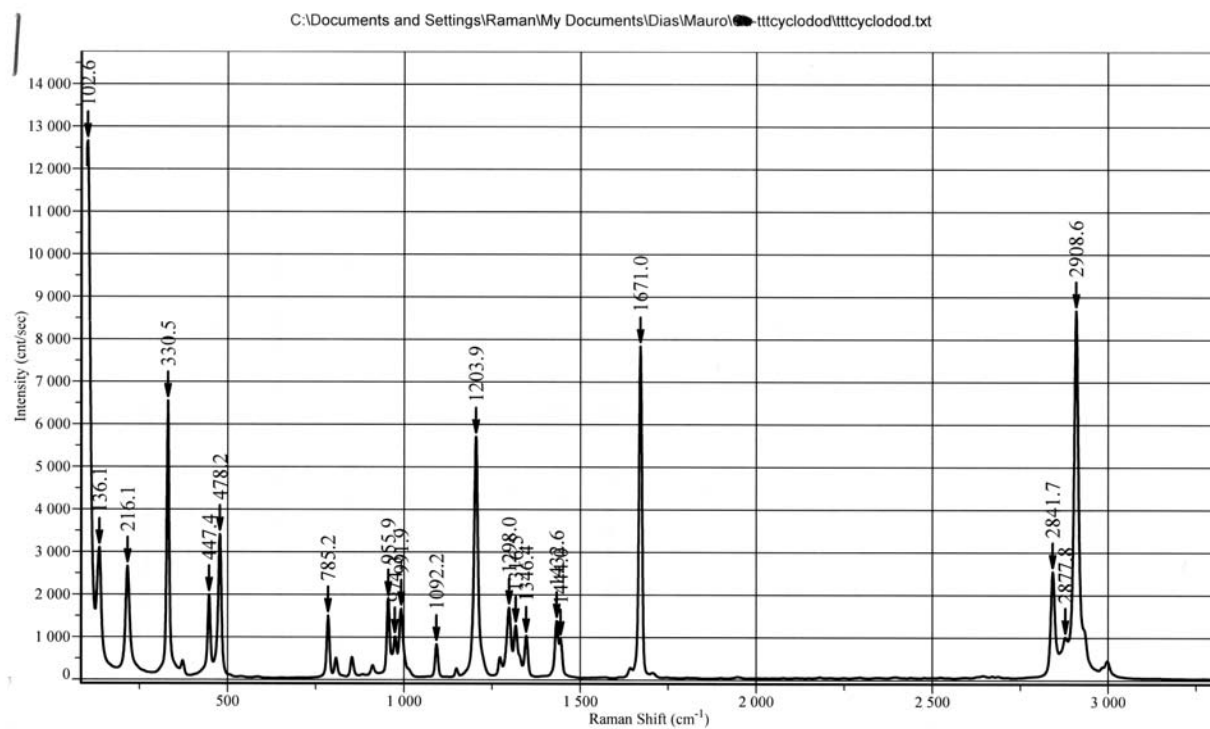

|              |        |          |                      |
|--------------|--------|----------|----------------------|
| Exposition   | 1      | Slit     | 100                  |
| Accumulation | 30     | Operator | Mauro                |
| Laser        | 632.81 | Sample   | ●●(t,t,t-cyclodod)●● |
| Spectro      | Multi  | Remark   | 30 accum.            |
| Hole         | 200    | Power    | laser633nm D2        |

**HORIBA** JOBIN YVON
